# Supplementary material
Source: MDPI journal article supplement (https://www.mdpi.com/2071-1050/15/11/9050)
Supplement: s1 [file s1]

Archive with 2 entries (2 files):
- File S1. Questionnaire form.pdf
- File S2. Frequency of variables of the questionnaire.pdf
