# Supplementary material
Source: MDPI journal article supplement (https://www.mdpi.com/2071-1050/15/11/9050)
Supplement: s1 [file s1 › File S1. Questionnaire form.pdf]

### Questionnaire

Dear sir / madam...

This questionnaire is prepared as part of the requirements for obtaining a Ph.D. degree in architecture, It is conducted in the architecture department, college of engineering, Salahaddin university-Erbil.

The aim of this questionnaire is to ask the experts in the field of architecture about:

- 1- The essence and potentiality of the architecture identity as a continuous process through the tensional relationship between inheritance and creation of architectural identity.
- 2- Elements associated to cultural heritage that influence on the continuity of architectural identity in the houses of Erbil city (1900-2020).

Your contribution and allow your valuable time for us is highly appreciated. This questionnaire is used for scientific purposes.

Ph.D candidate: **Binyad Maruf Abdulkadir Khaznadar (Lecturer)**

Email: [binyad.khaznadar@su.edu.krd](mailto:binyad.khaznadar@su.edu.krd)

Mobile: 07504459757

Supervisor: **Dr. Salahaddin Yasen Baper (Assistant Professor)**

#### General information:

| Academic qualification | Bachelor (B.Sc.) | Master degree (M.Sc.) | Ph.D. degree | Others, specify please |
|------------------------|------------------|-----------------------|--------------|------------------------|
|------------------------|------------------|-----------------------|--------------|------------------------|

| Working sector | University | Government sector | Private sector | Others, specify please |
|----------------|------------|-------------------|----------------|------------------------|
|----------------|------------|-------------------|----------------|------------------------|

| Age | 18-24 | 24-39 | 40-60 | 60 and above |
|-----|-------|-------|-------|--------------|
|-----|-------|-------|-------|--------------|

#### Note:

- 1- The selection fields in this questionnaire are arranged according to a five point Likert type scale.
- 2- Please tick (/) just one cell in each description.

**Part one: The essence and potentiality of the architecture identity as a continuous process through the tensional relationship between inheritance and creation of architectural identity.**

| Code | Question                                                               | Totally agree | Agree | Neutral | Disagree | Totally Disagree |
|------|------------------------------------------------------------------------|---------------|-------|---------|----------|------------------|
| X1-1 | Architectural identity is a static object that inherited from the past |               |       |         |          |                  |
| X1-2 | Architectural identity could be created at any time                    |               |       |         |          |                  |

|       |                                                                                                                                                                |  |  |  |  |
|-------|----------------------------------------------------------------------------------------------------------------------------------------------------------------|--|--|--|--|
| X1-3  | Architectural identity is the result of the tensional relationship between keeping past identities and creating new identities                                 |  |  |  |  |
| X1-4  | Factors affecting the process of continuity in architectural identity vary in different cultures and contexts.                                                 |  |  |  |  |
| X1-5  | (Time) is an effective factor in the process of continuity of architectural identity.                                                                          |  |  |  |  |
| X1-6  | (Place) is an effective factor in the process of continuity of architectural identity.                                                                         |  |  |  |  |
| X1-7  | The level of identity representation, including (architecture, urban, planning, and region) influences on the process of continuity of architectural identity. |  |  |  |  |
| X1-8  | Functionality is more representing architectural identity.                                                                                                     |  |  |  |  |
| X1-9  | Form as visual aspect is more reflecting architectural identity.                                                                                               |  |  |  |  |
| X1-10 | Non-physical aspects related to build environments and contexts mostly represent identities.                                                                   |  |  |  |  |

**Part two: The influence of (cultural heritage) elements on the (continuity of architectural identity) in houses of Erbil city (1900-2020)**

| Code                                      | Question                                                                                                                                                              | Totally agree | Agree | Neutral | Disagree | Totally Disagree |
|-------------------------------------------|-----------------------------------------------------------------------------------------------------------------------------------------------------------------------|---------------|-------|---------|----------|------------------|
| <b>2-Physical factors</b>                 |                                                                                                                                                                       |               |       |         |          |                  |
| <b>2-1 Factors related to plan layout</b> |                                                                                                                                                                       |               |       |         |          |                  |
| X2-1-1                                    | The setback and the relationship between house mass and street (public domain) influences on the continuity of architectural identity.                                |               |       |         |          |                  |
| X2-1-2                                    | The relationship between house's ground level and street level influences on the continuity of architectural identity.                                                |               |       |         |          |                  |
| X2-1-3                                    | The relationship between indoor and outdoor spaces of the house influences on the continuity of architectural identity.                                               |               |       |         |          |                  |
| X2-1-4                                    | The enclosure or space openness towards inside and outside influences on the continuity of architectural identity.                                                    |               |       |         |          |                  |
| X2-1-5                                    | Location of the house within the plot of the land influences on the continuity of architectural identity.                                                             |               |       |         |          |                  |
| X2-1-6                                    | Ratio of house to open space area influences on the continuity of architectural identity.                                                                             |               |       |         |          |                  |
| X2-1-7                                    | Space configuration inside the house influences on the continuity of architectural identity.                                                                          |               |       |         |          |                  |
| X2-1-8                                    | Number of entrances in the house influences on the continuity of architectural identity.                                                                              |               |       |         |          |                  |
| X2-1-9                                    | Direct access from outside to specific spaces inside the house like (guest room, living room, kitchen...etc.) influences on the continuity of architectural identity. |               |       |         |          |                  |
| X2-1-10                                   | Type of circulation inside the house influences on the continuity of architectural identity.                                                                          |               |       |         |          |                  |
| X2-1-11                                   | Location of the staircase inside and outside the house influences on the continuity of architectural identity.                                                        |               |       |         |          |                  |
| X2-1-12                                   | Defining functional zones inside the house influences on the continuity of architectural identity.                                                                    |               |       |         |          |                  |
| X2-1-13                                   | Location of functional zones inside the house influences on the continuity of architectural identity.                                                                 |               |       |         |          |                  |
| X2-1-14                                   | Diversity of functions inside the house influences on the continuity of architectural identity.                                                                       |               |       |         |          |                  |
| X2-1-15                                   | Hierarchy of spaces in the house and the availability of a dominant space                                                                                             |               |       |         |          |                  |

|                                      |                                                                                                                                     |  |  |  |  |
|--------------------------------------|-------------------------------------------------------------------------------------------------------------------------------------|--|--|--|--|
|                                      | influences on the continuity of architectural identity.                                                                             |  |  |  |  |
| X2-1-16                              | The position of the dominant space in the house influences on the continuity of architectural identity.                             |  |  |  |  |
| X2-1-17                              | Variety of spaces located in house's front facade influences on the continuity of architectural identity.                           |  |  |  |  |
| X2-1-18                              | Shape of window in the plan layout influences on the continuity of architectural identity.                                          |  |  |  |  |
| X2-1-19                              | The ratio of solid (wall) to openings (windows) of the space in plan layout influences on the continuity of architectural identity. |  |  |  |  |
| X2-1-20                              | The location of the main entrance within the façade influences on the continuity of architectural identity.                         |  |  |  |  |
| X2-1-21                              | Shape of the entrance in the plan layout influences on the continuity of architectural identity.                                    |  |  |  |  |
| X2-1-22                              | Visibility of spaces from outside influences on the continuity of architectural identity.                                           |  |  |  |  |
| X2-1-23                              | Spaces those are mostly visible from outside influences on the continuity of architectural identity.                                |  |  |  |  |
| <b>2-2 Factors related to façade</b> |                                                                                                                                     |  |  |  |  |
| X2-2-1                               | The height of the house influences on the continuity of architectural identity.                                                     |  |  |  |  |
| X2-2-2                               | The regularity of mass influences on the continuity of architectural identity.                                                      |  |  |  |  |
| X2-2-3                               | Articulation in façade influences on the continuity of architectural identity.                                                      |  |  |  |  |
| X2-2-4                               | The symmetrical arrangement of façade elements influences on the continuity of architectural identity.                              |  |  |  |  |
| X2-2-5                               | The rhythmical arrangements of the elements in the façade influences on the continuity of architectural identity.                   |  |  |  |  |
| X2-2-6                               | The multi-layering of façade influences on the continuity of architectural identity.                                                |  |  |  |  |
| X2-2-7                               | The unity of the façade influences on the continuity of architectural identity.                                                     |  |  |  |  |
| X2-2-8                               | Ratio of solid to void in the façade influences on the continuity of architectural identity.                                        |  |  |  |  |
| X2-2-9                               | Using various elements in the facade influences on the continuity of architectural identity.                                        |  |  |  |  |
| X2-2-10                              | The height of window from the ground level influences on the continuity of architectural identity.                                  |  |  |  |  |
| X2-2-11                              | Size of the window influences on the continuity of architectural identity.                                                          |  |  |  |  |
| X2-2-12                              | The element being recessed or eclipsed regarding the façade line influences on the continuity of architectural identity.            |  |  |  |  |
| X2-2-13                              | Formal typologies of façade elements influences on the continuity of architectural identity.                                        |  |  |  |  |
| X2-2-14                              | Finishing materials used in the façade influences on the continuity of architectural identity.                                      |  |  |  |  |
| X2-2-15                              | Using different colours in the façade influences on the continuity of architectural identity.                                       |  |  |  |  |
| X2-2-16                              | Using hybrid architectural styles in the façade influences on the continuity of architectural identity.                             |  |  |  |  |
| <b>3- Socio-cultural factors</b>     |                                                                                                                                     |  |  |  |  |
| X3-1                                 | The need for a space that provides psychological comfort to its occupants influences on the continuity of architectural identity.   |  |  |  |  |
| X3-2                                 | Feeling safe within the house environment influences on the continuity of architectural identity.                                   |  |  |  |  |

|                                              |                                                                                                                      |  |  |  |  |
|----------------------------------------------|----------------------------------------------------------------------------------------------------------------------|--|--|--|--|
| X3-3                                         | Sense of territoriality in the house influences on the continuity of architectural identity.                         |  |  |  |  |
| X3-4                                         | Sense of belonging to place influences on the continuity of architectural identity.                                  |  |  |  |  |
| X3-5                                         | Self-identity influences on the continuity of architectural identity.                                                |  |  |  |  |
| X3-6                                         | Separation between genders inside the house influences on the continuity of architectural identity.                  |  |  |  |  |
| X3-7                                         | Separation of strangers from family members inside the house influences on the continuity of architectural identity. |  |  |  |  |
| X3-8                                         | Cultural shifts influences on the continuity of architectural identity.                                              |  |  |  |  |
| X3-9                                         | Change in cultural values and believes influences on the continuity of architectural identity.                       |  |  |  |  |
| X3-10                                        | Change in way of life influences on the continuity of architectural identity.                                        |  |  |  |  |
| X3-11                                        | Change in social relationships influences on the continuity of architectural identity.                               |  |  |  |  |
| X3-12                                        | Family size influences on continuity of architectural identity.                                                      |  |  |  |  |
| X3-13                                        | Religious believes influences on the continuity of architectural identity.                                           |  |  |  |  |
| <b>4- Factors of sustainable development</b> |                                                                                                                      |  |  |  |  |
| X4-1                                         | Change in construction methods influences on the continuity of architectural identity.                               |  |  |  |  |
| X4-2                                         | The invention of new building materials influences on the continuity of architectural identity.                      |  |  |  |  |
| X4-3                                         | Using photovoltaic panels in houses influences on the continuity of architectural identity.                          |  |  |  |  |
| X4-4                                         | Using thermal insulation materials for façade coating influences on the continuity of architectural identity.        |  |  |  |  |
| X4-5                                         | Increasing window size by using multi-layered glass influences on the continuity of architectural identity.          |  |  |  |  |
| X4-6                                         | Change in local authority regulations influences on the continuity of architectural identity.                        |  |  |  |  |
| X4-7                                         | Family income influences on the continuity of architectural identity.                                                |  |  |  |  |
