# Supplementary material
Source: MDPI journal article supplement (https://www.mdpi.com/2071-1050/15/11/9050)

File S2. Frequency of variables of the questionnaire

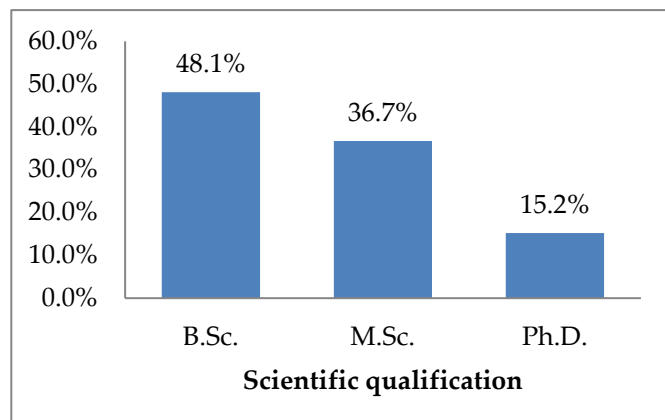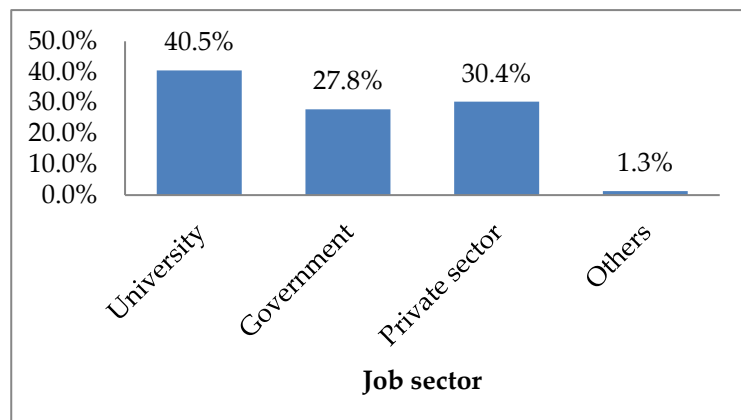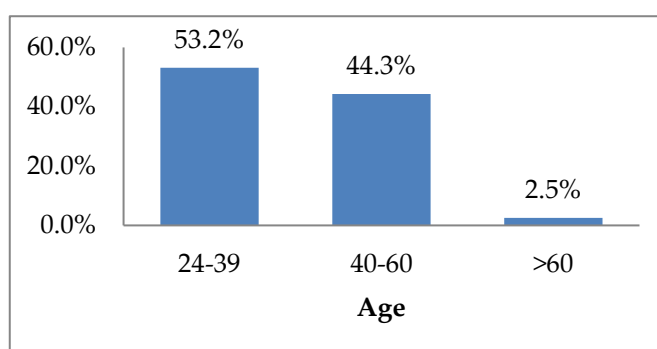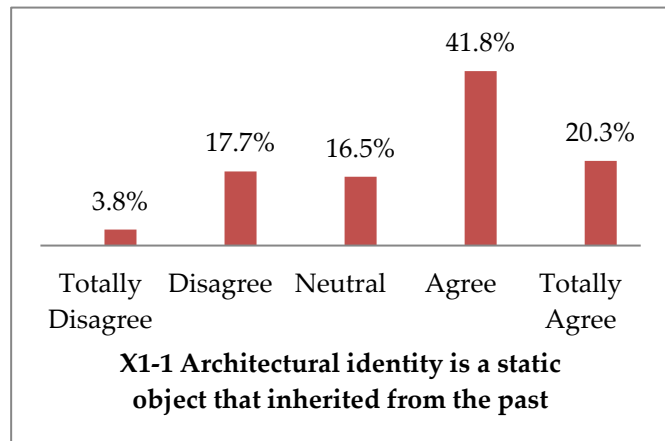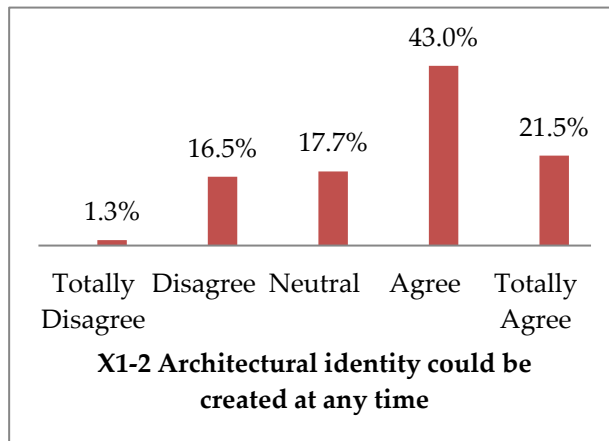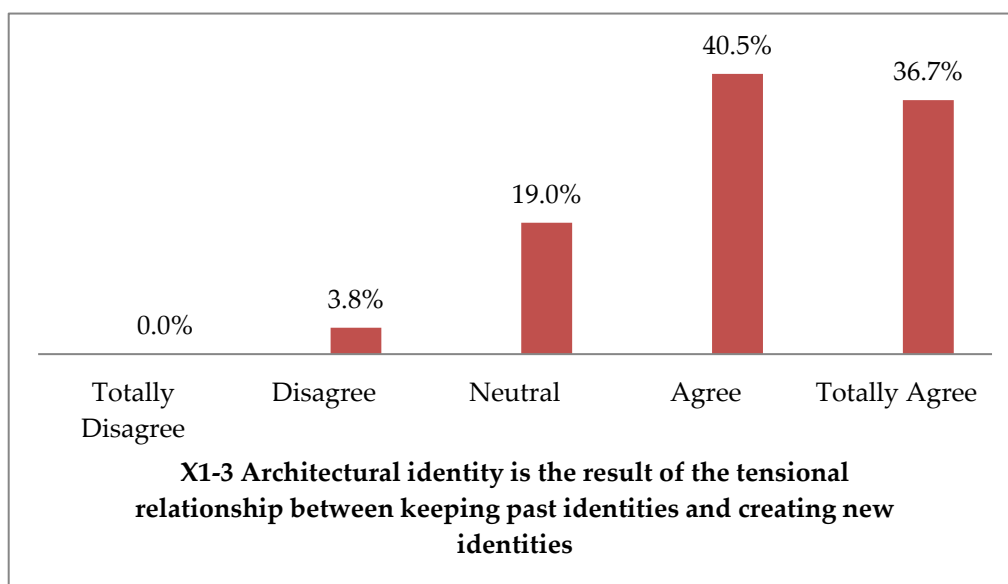

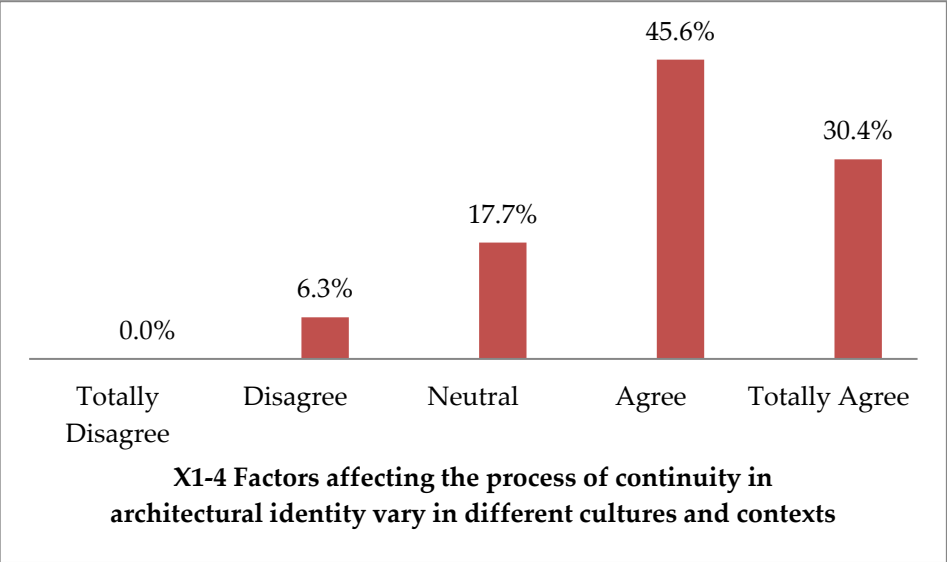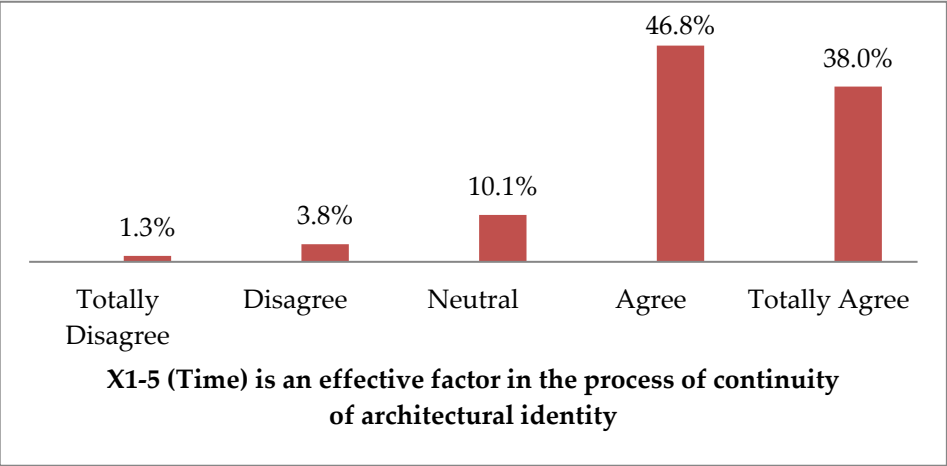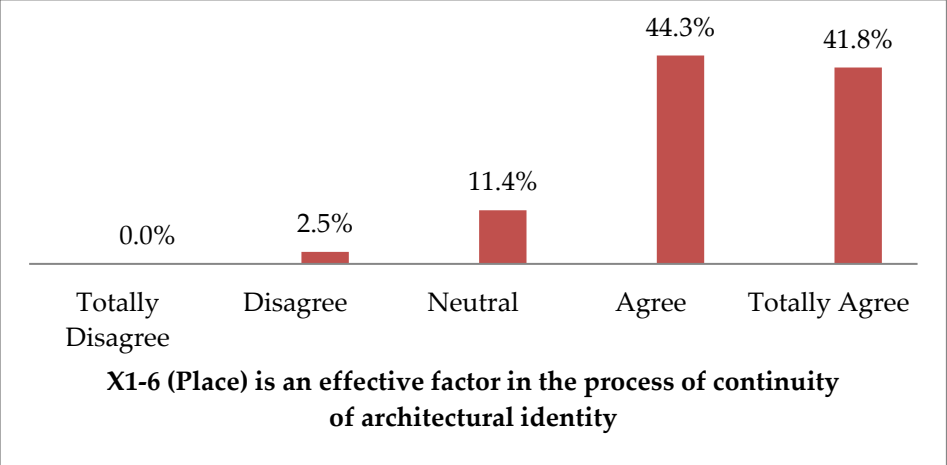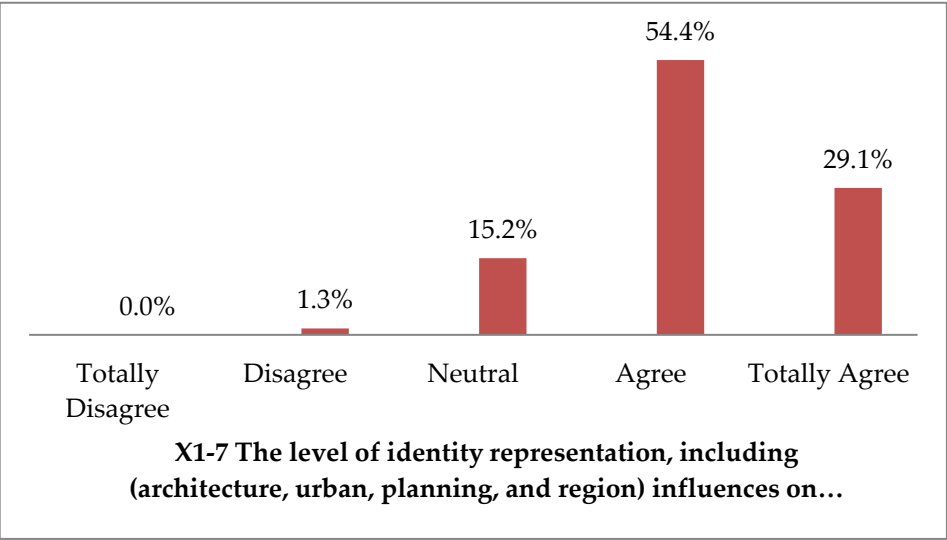

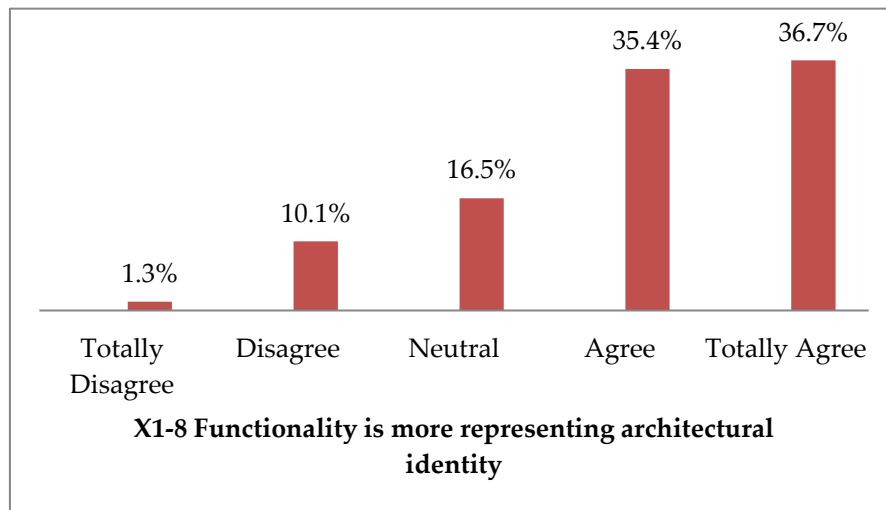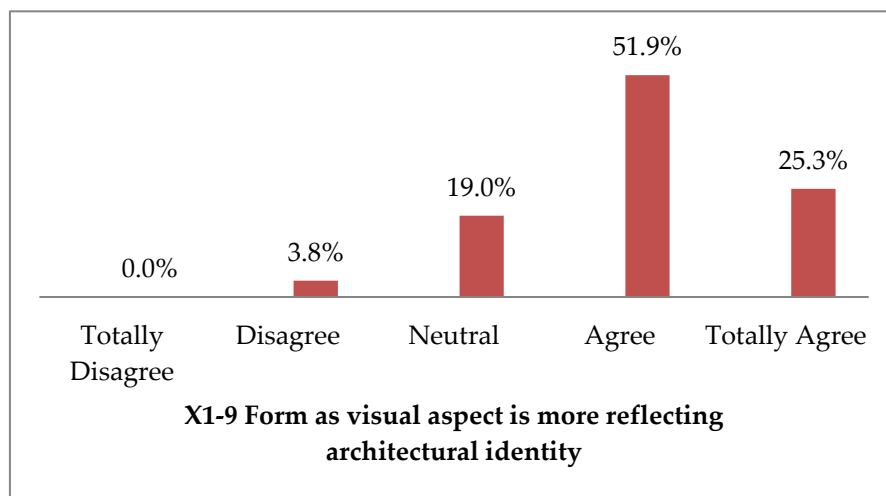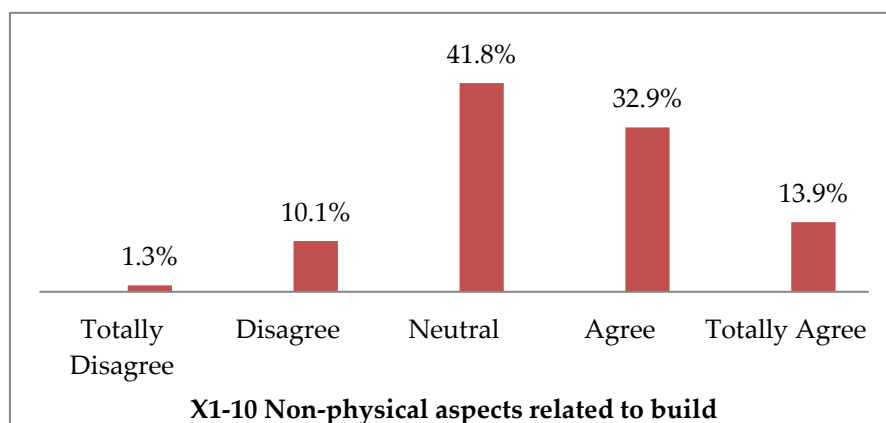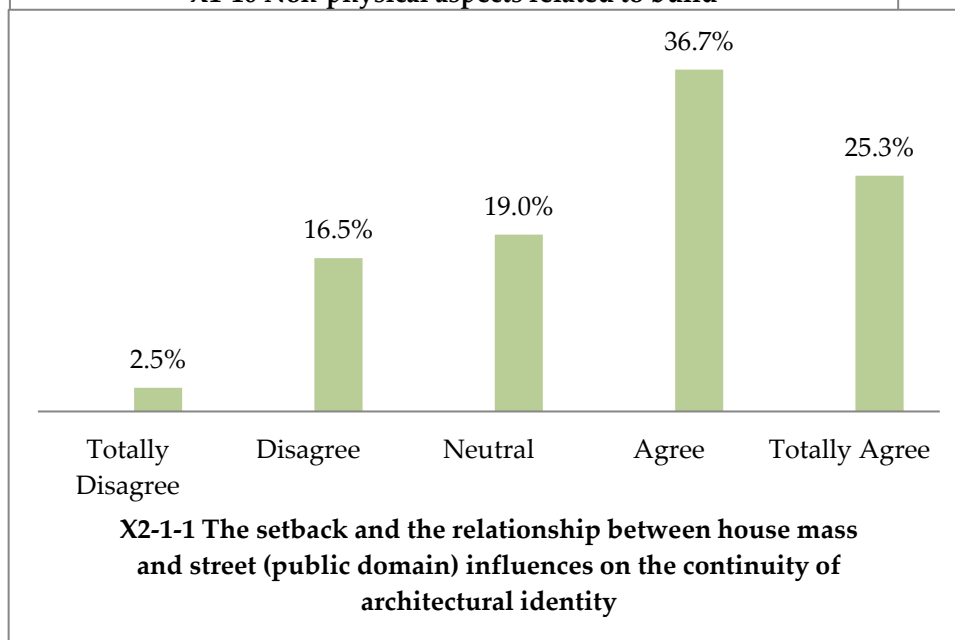

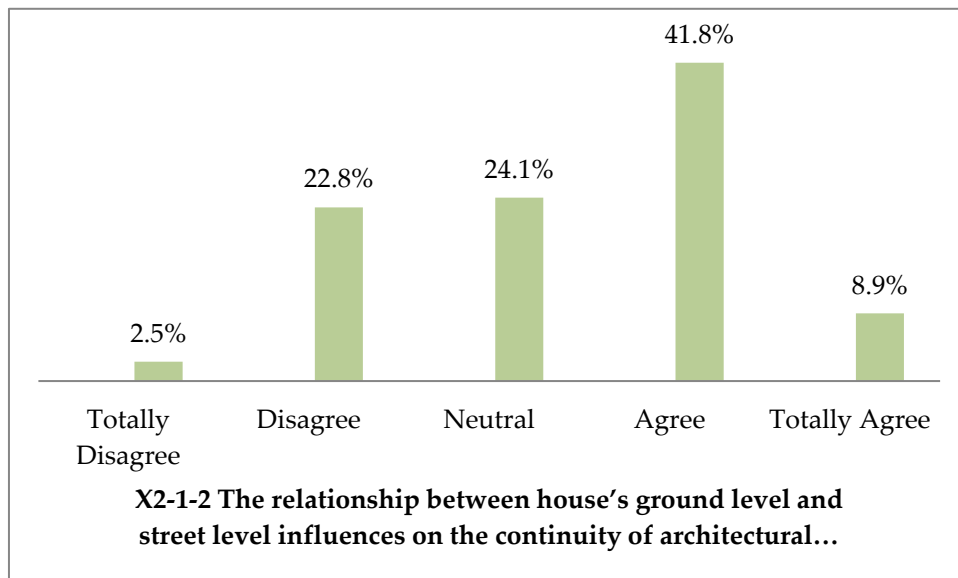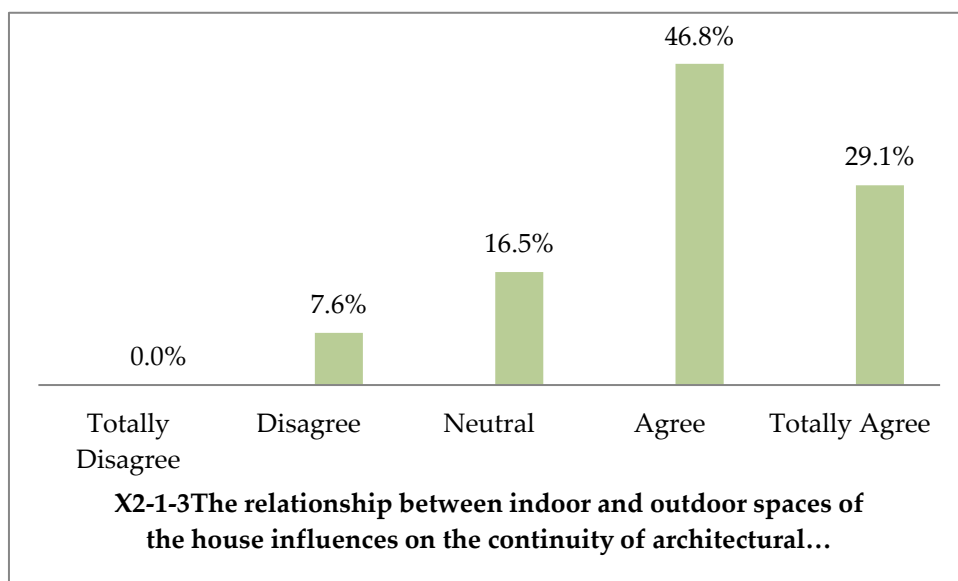

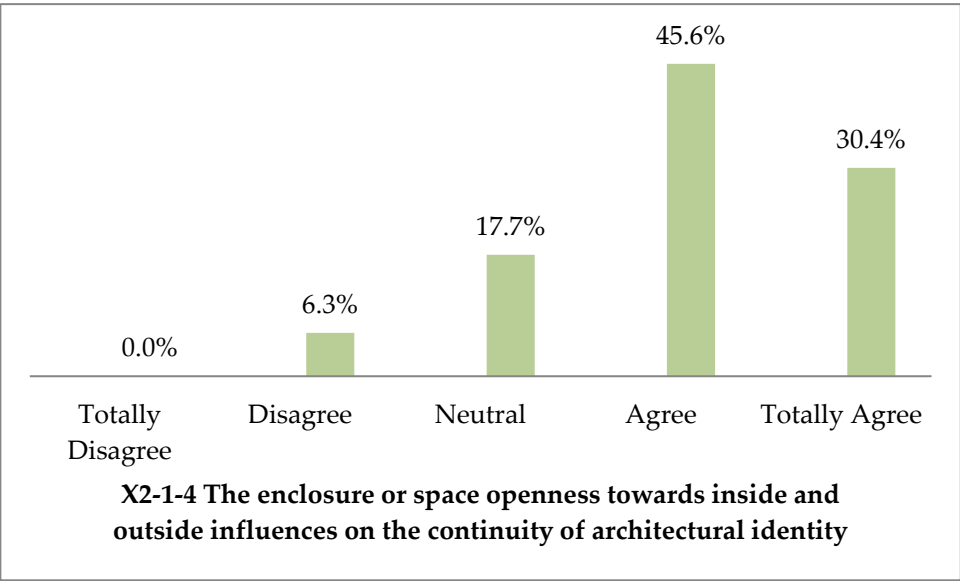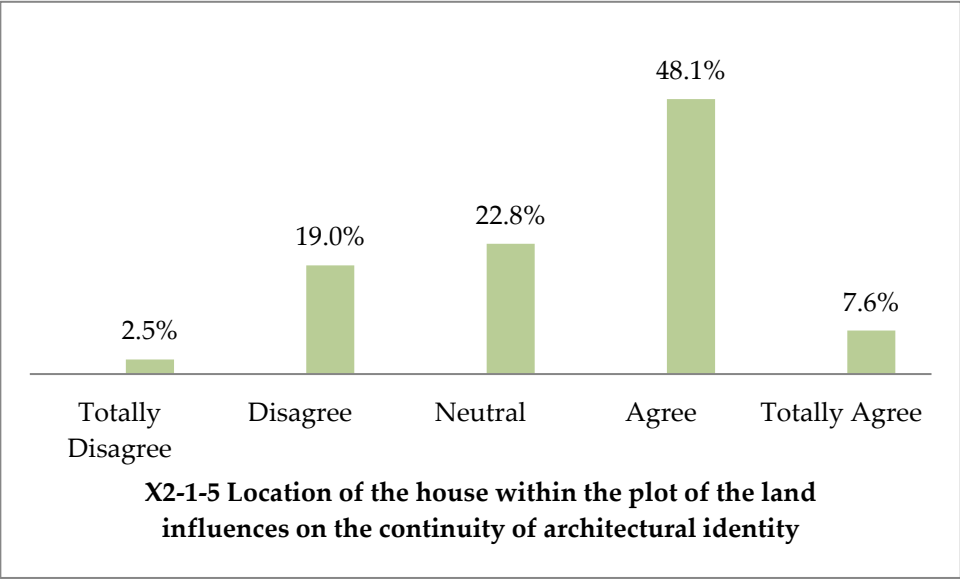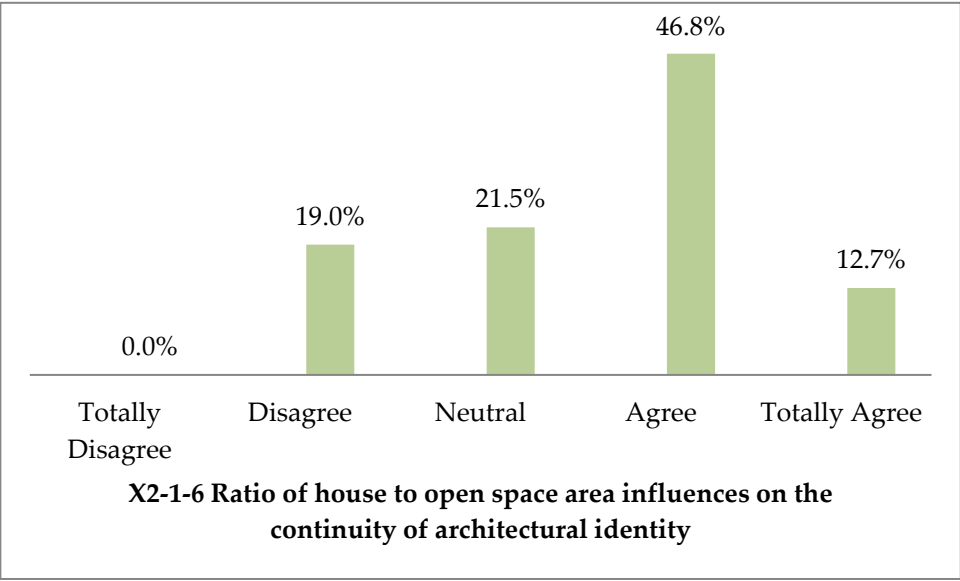

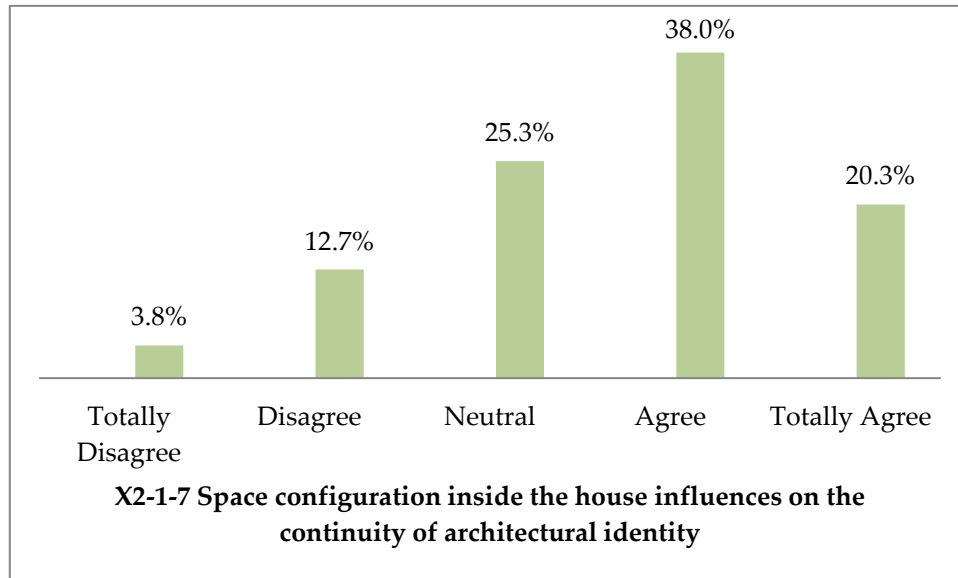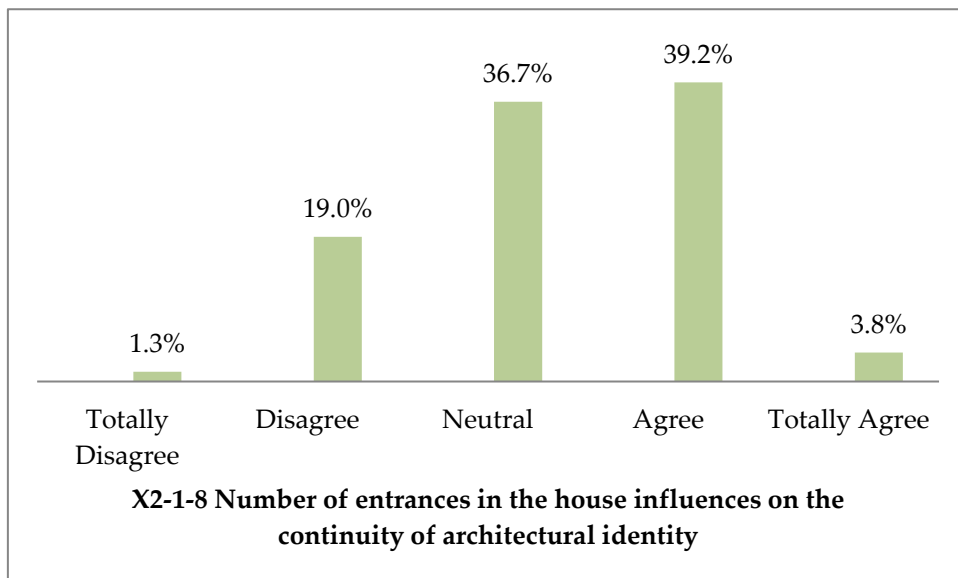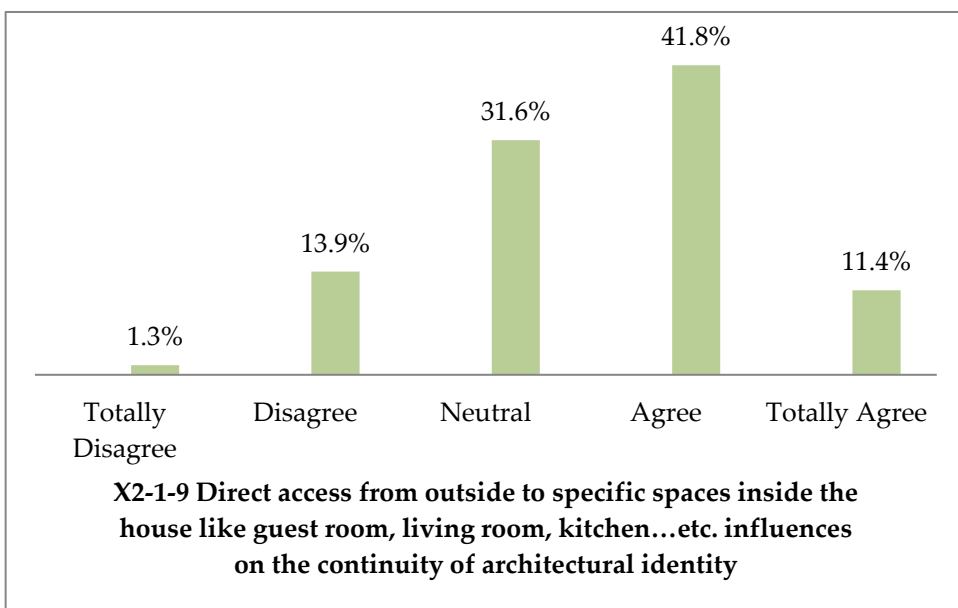

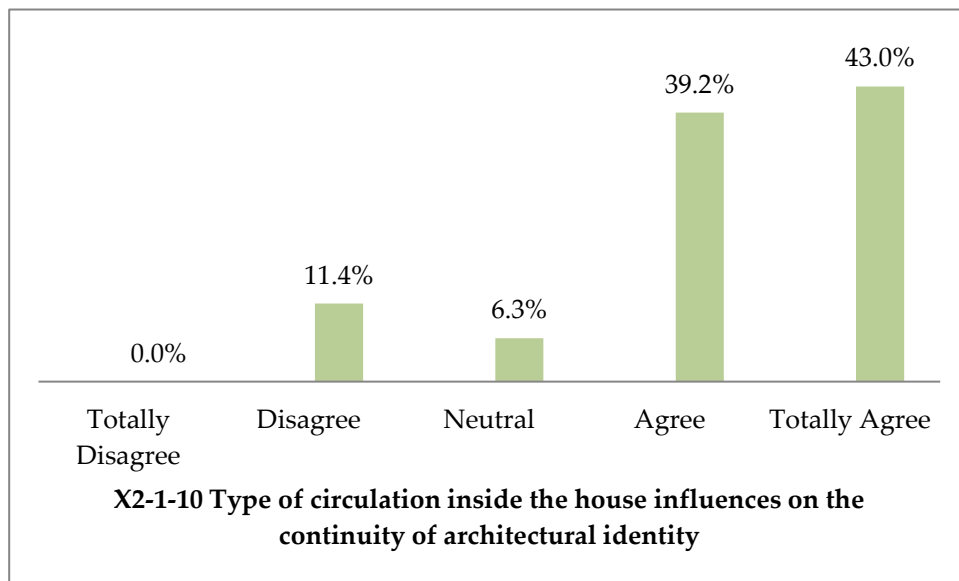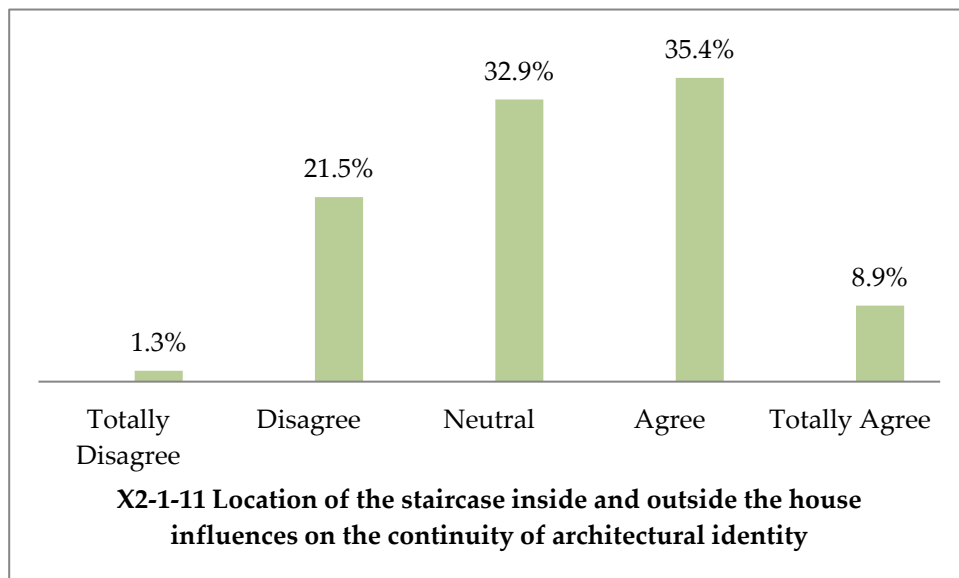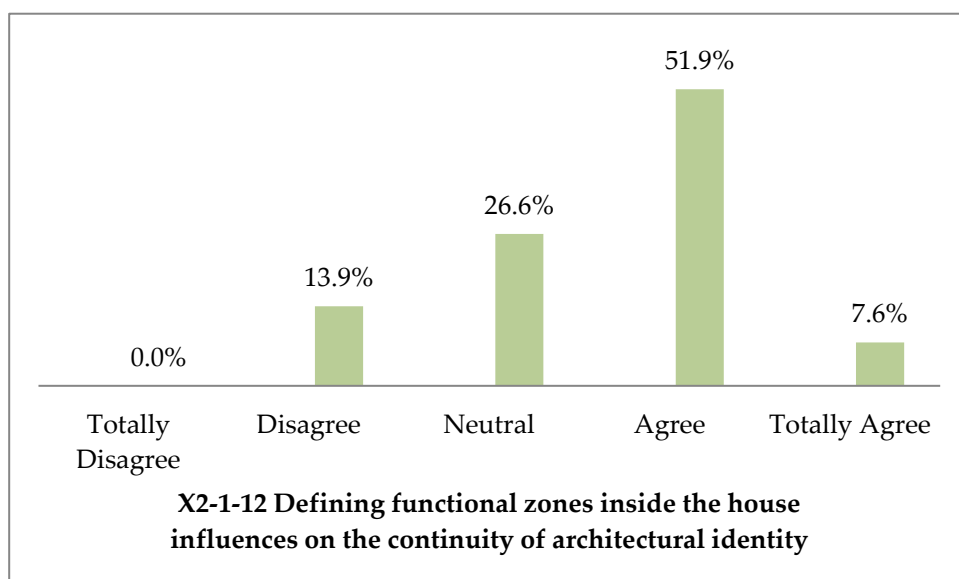

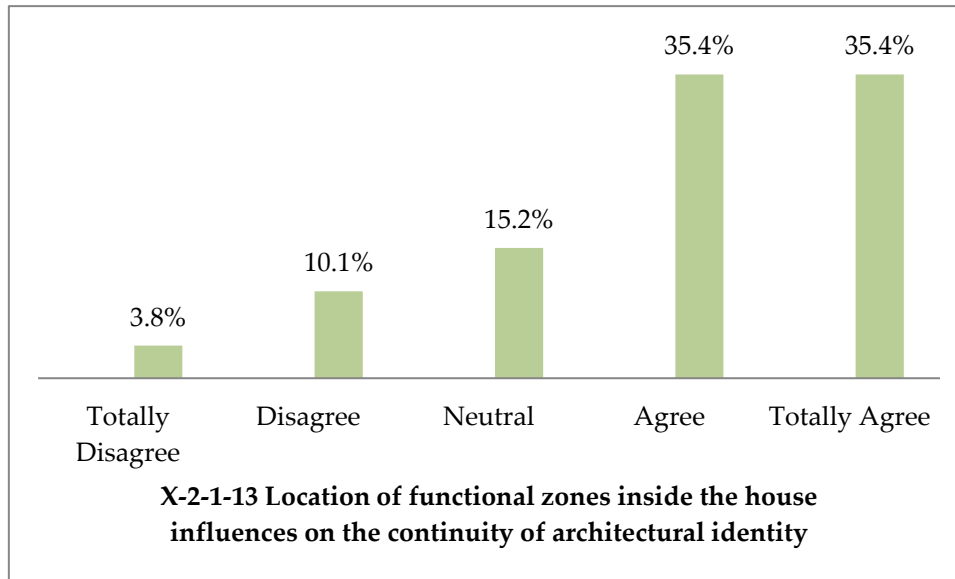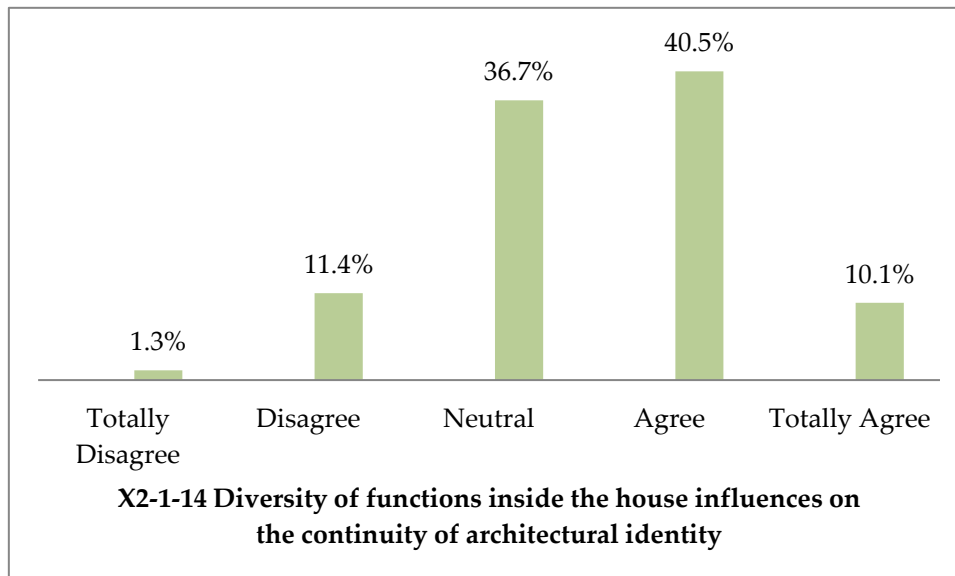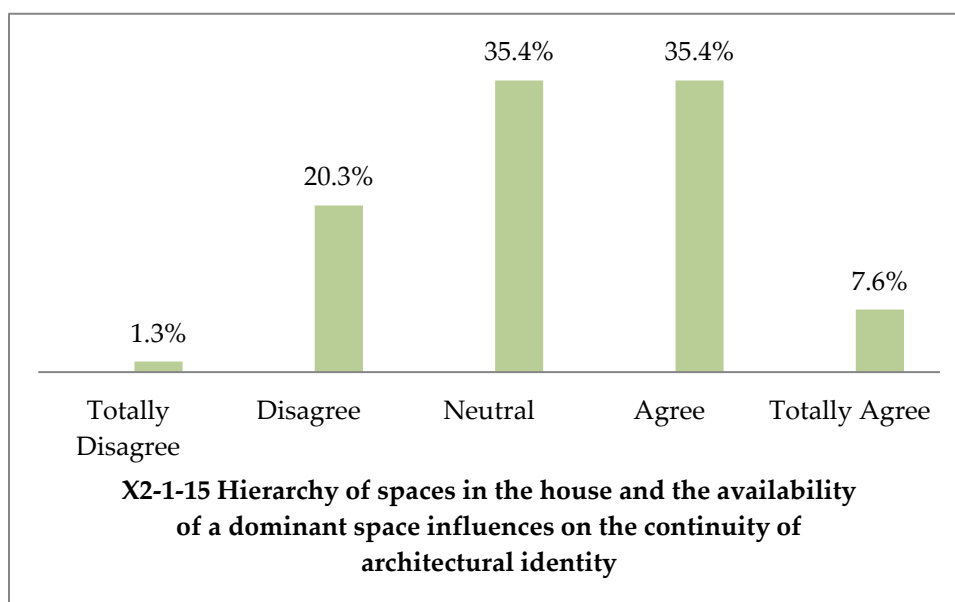



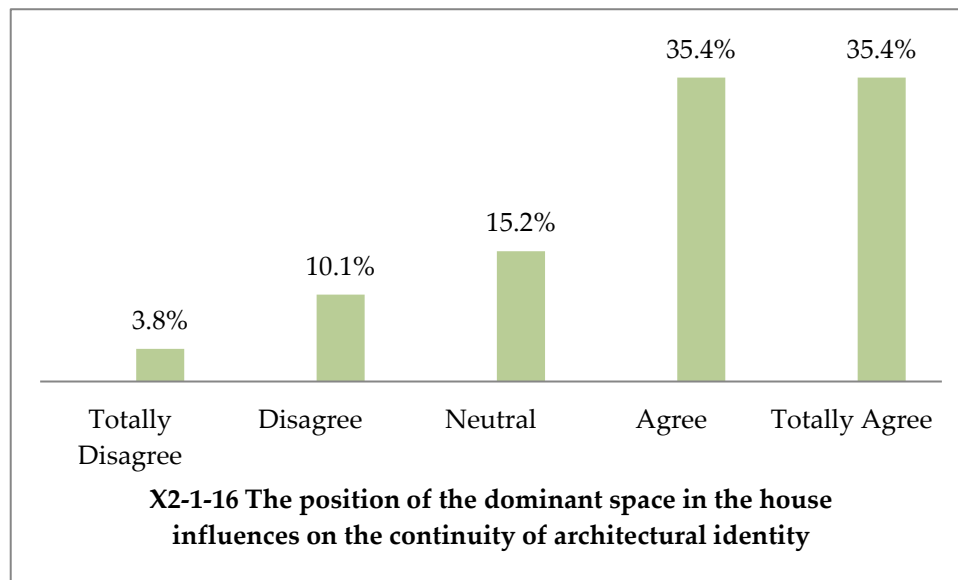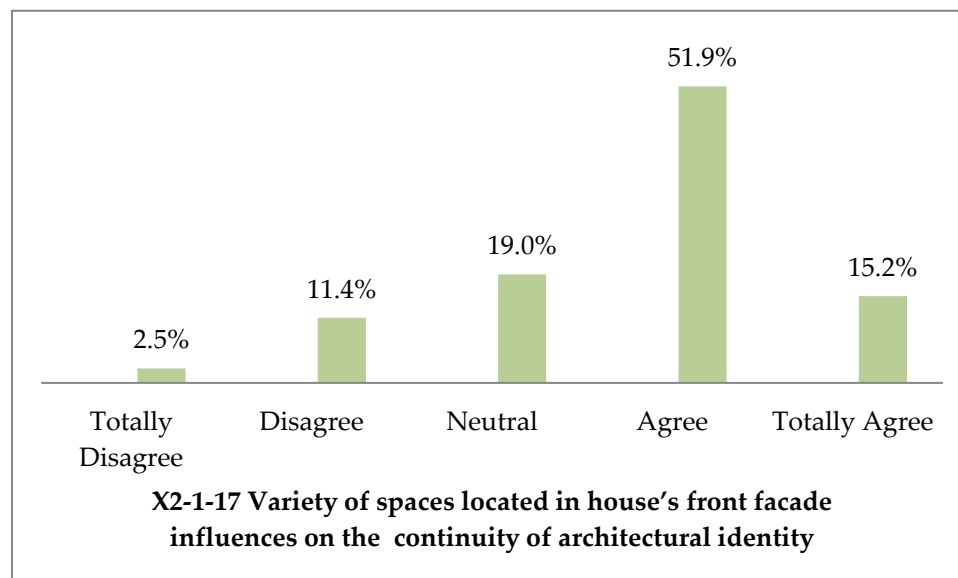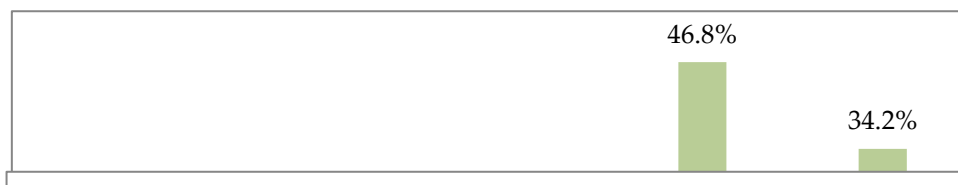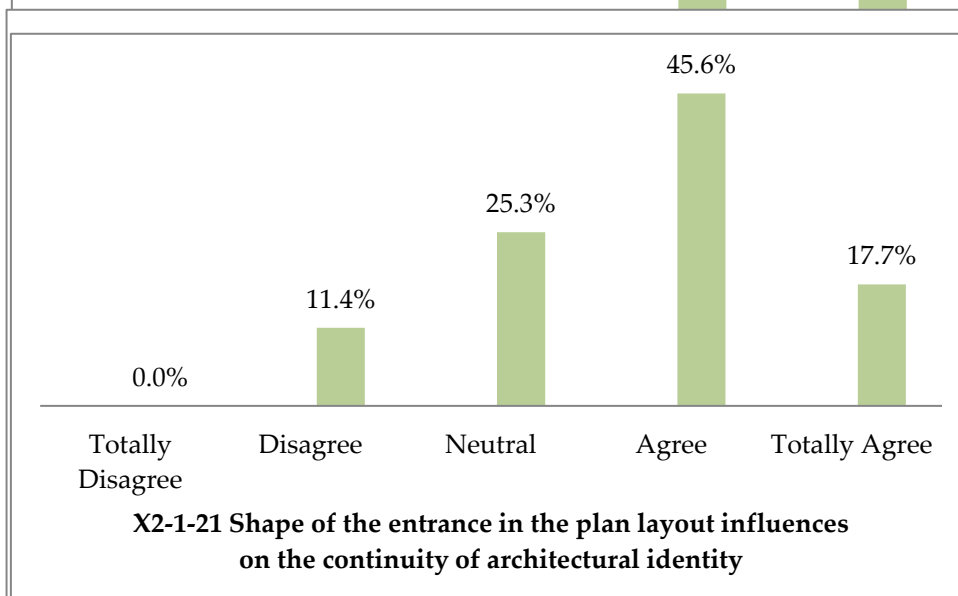

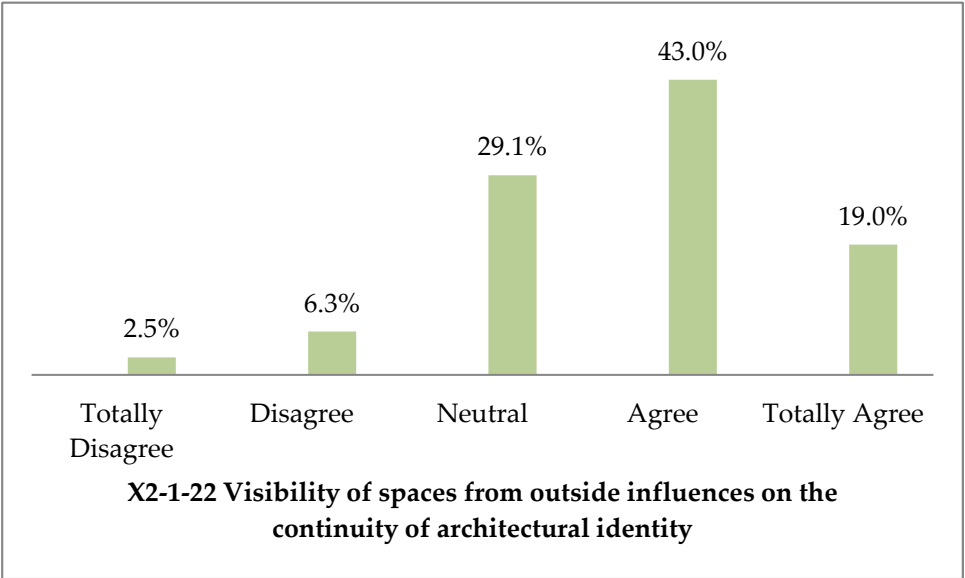

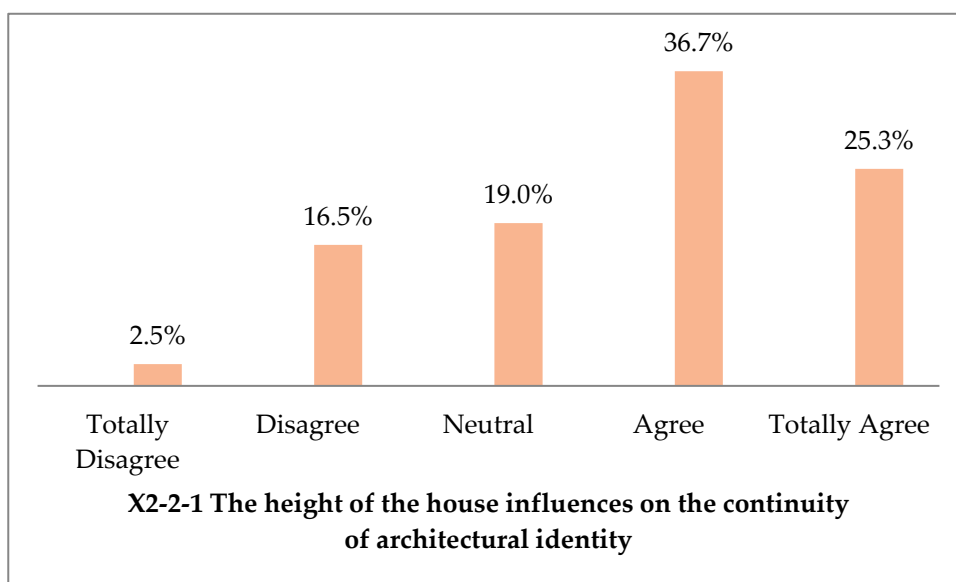

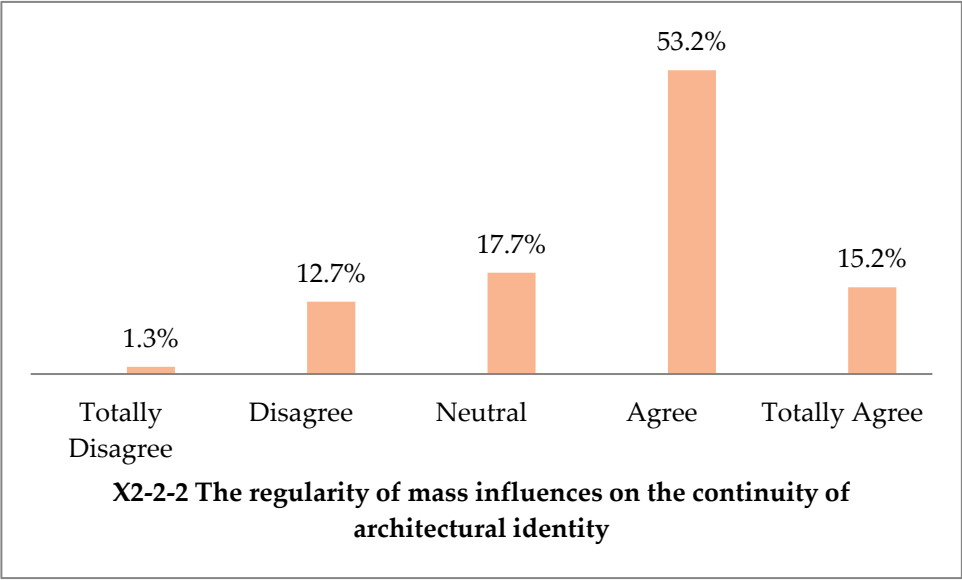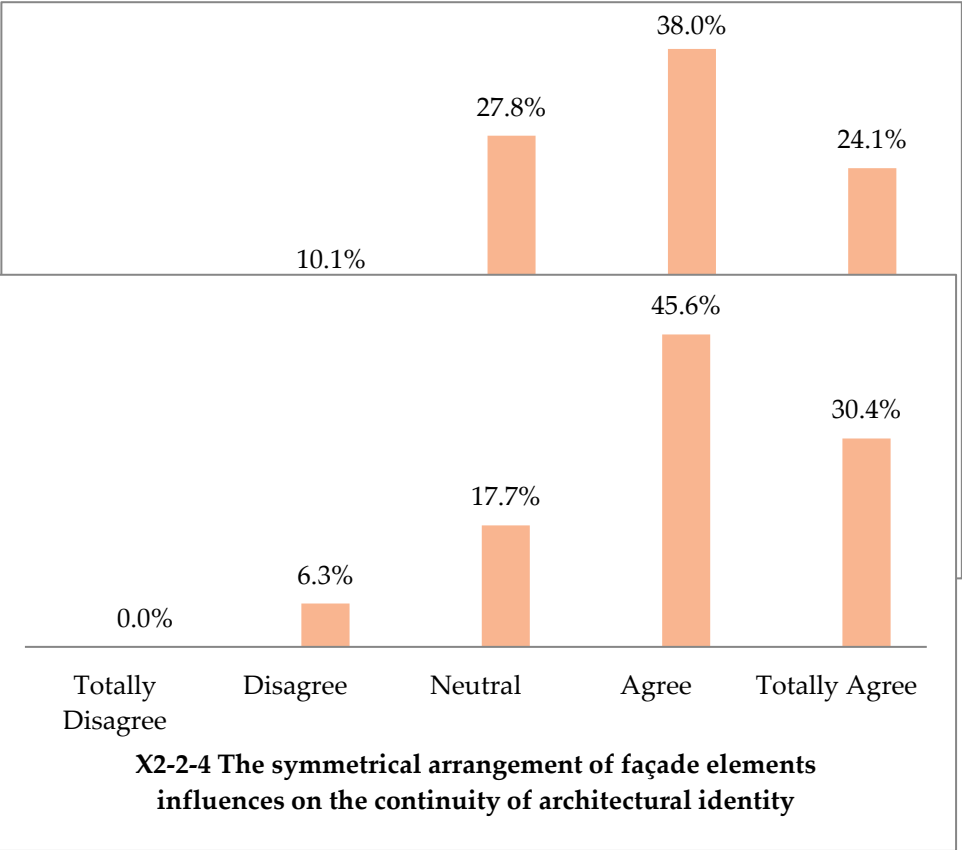

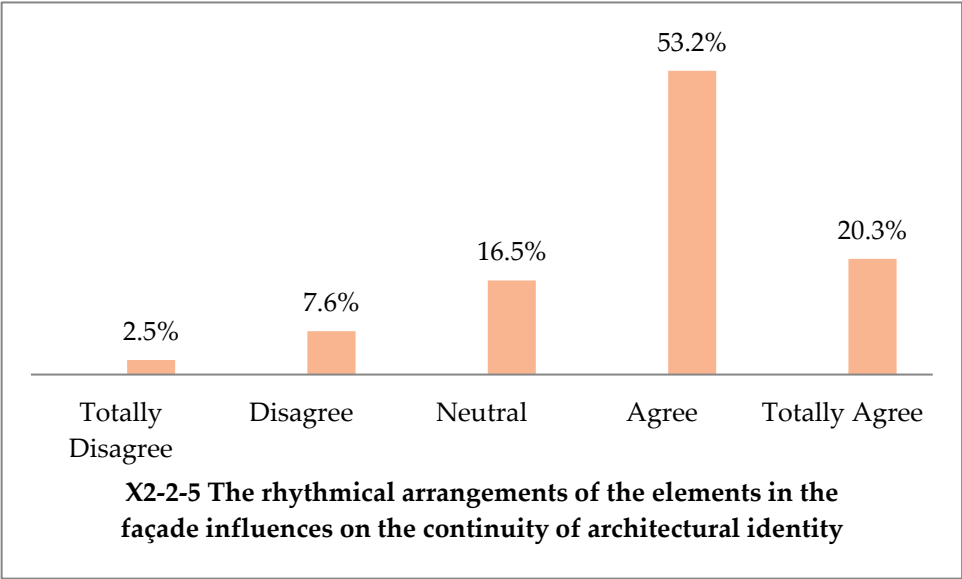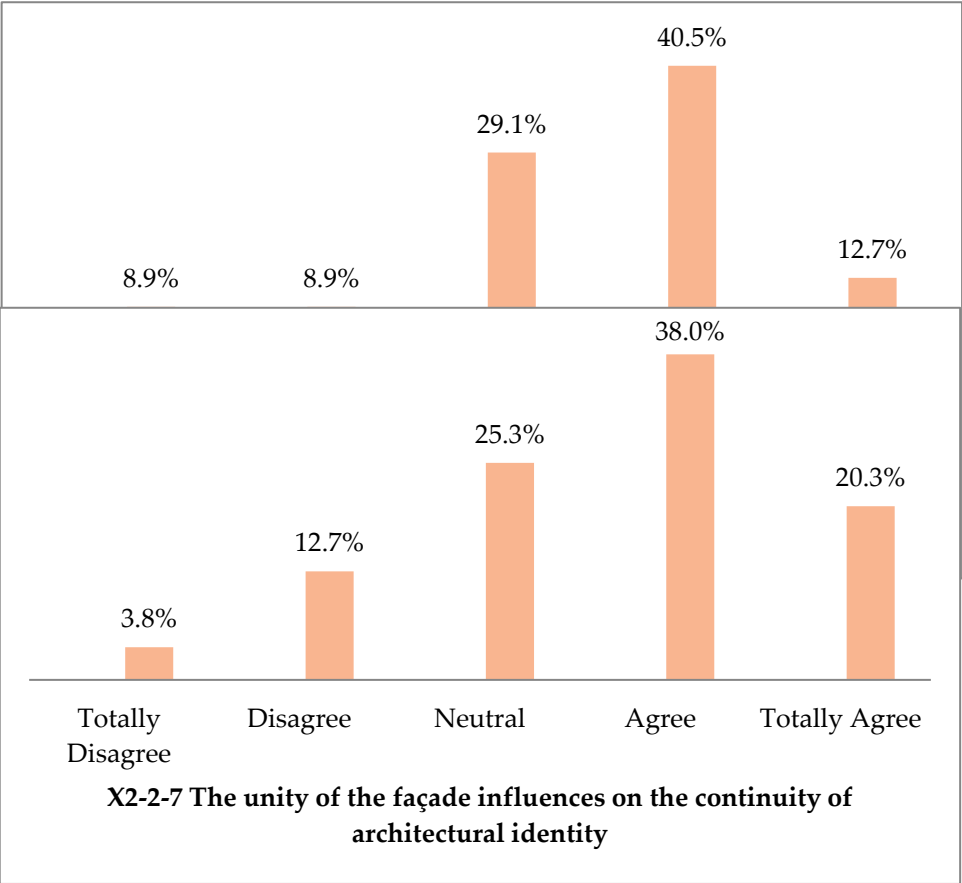

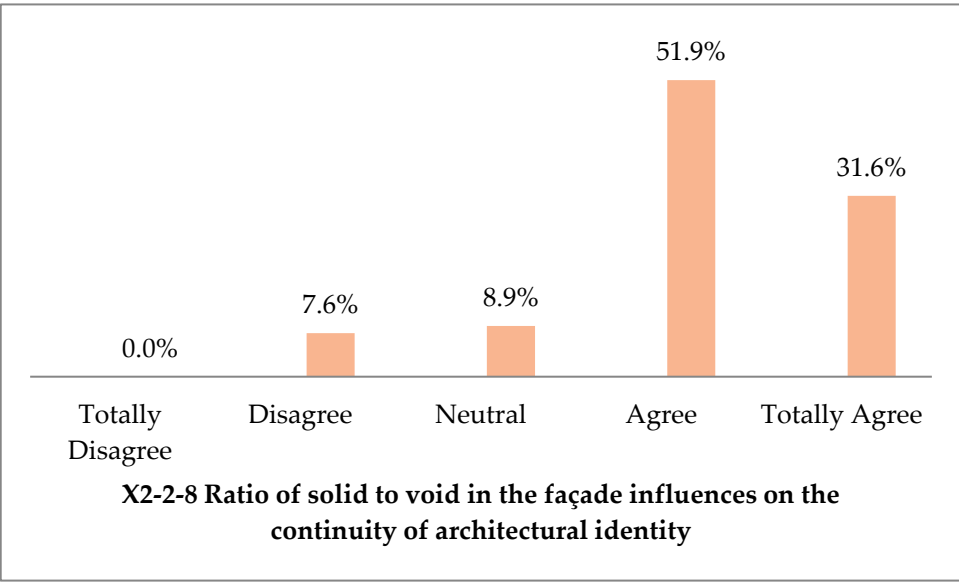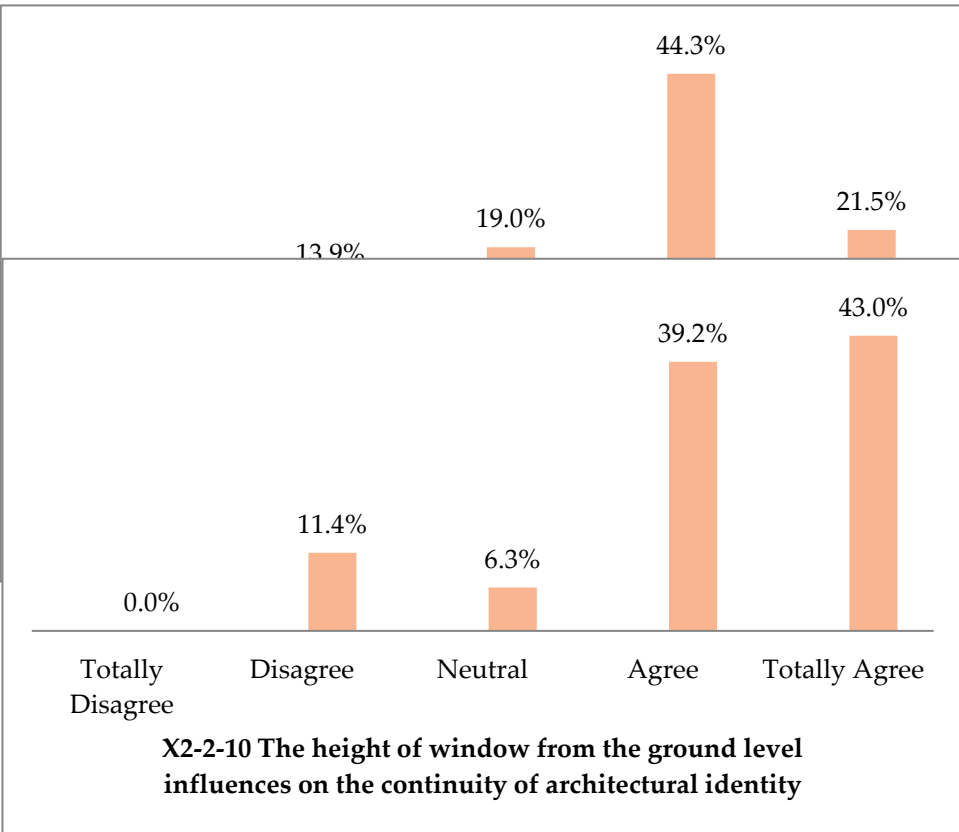

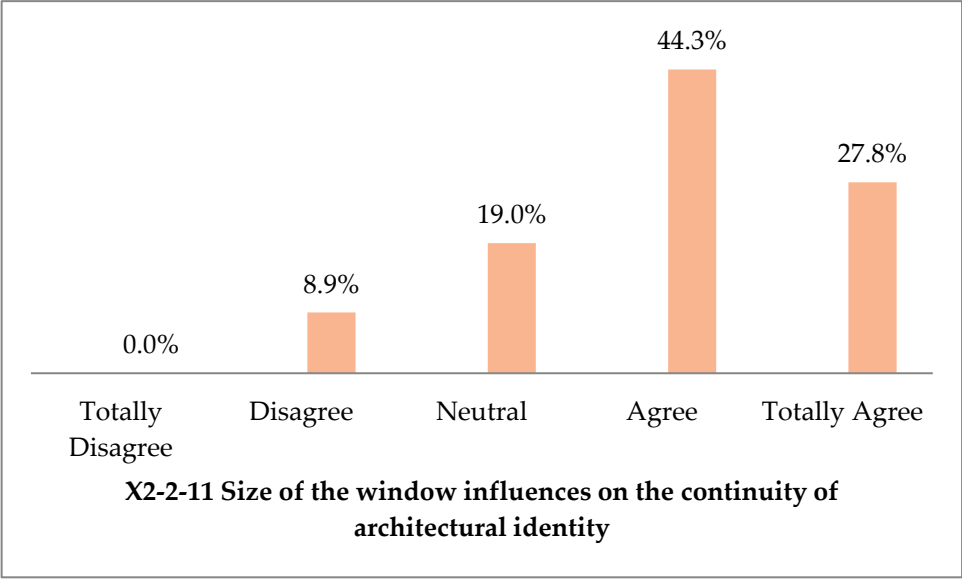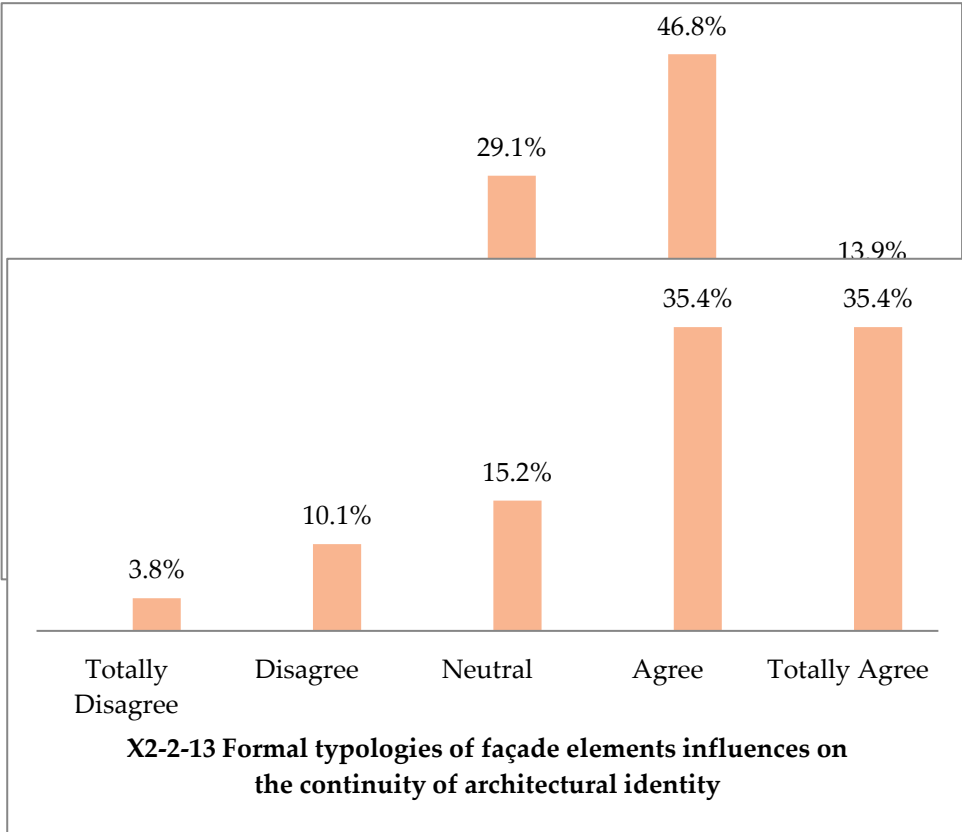

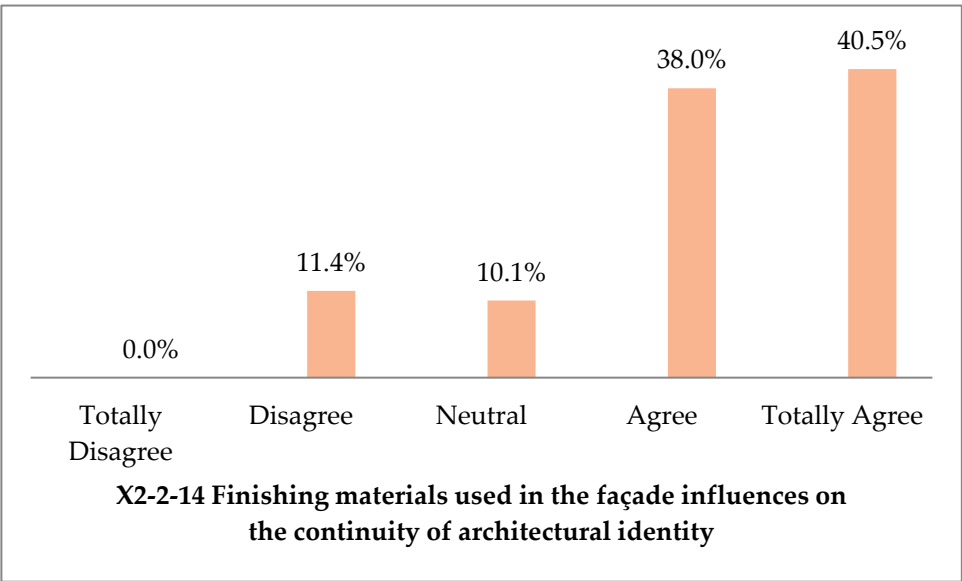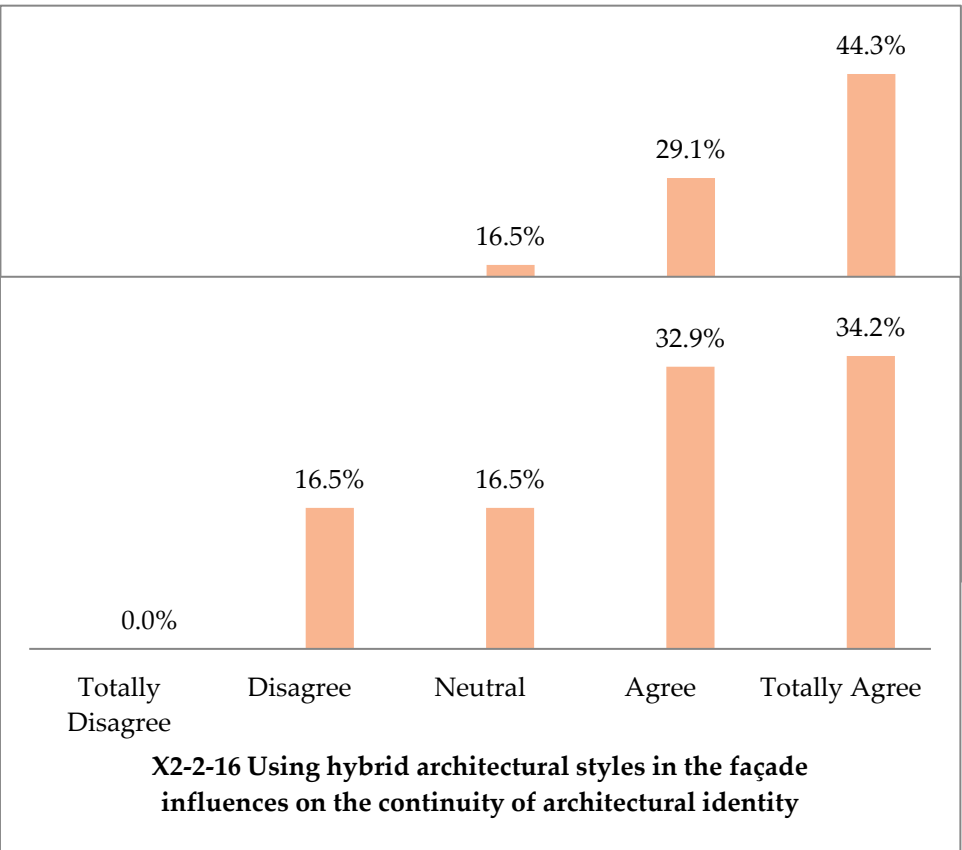



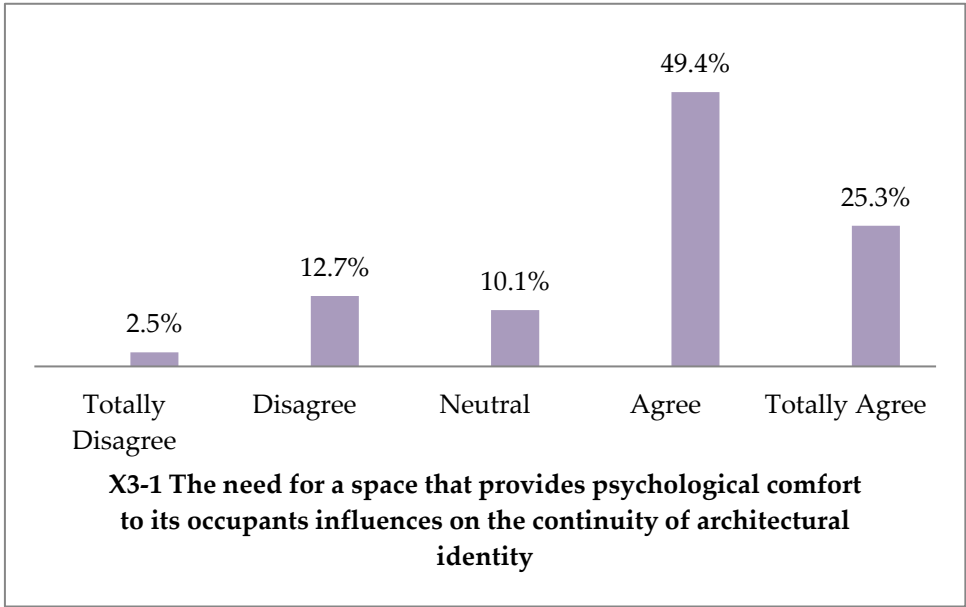

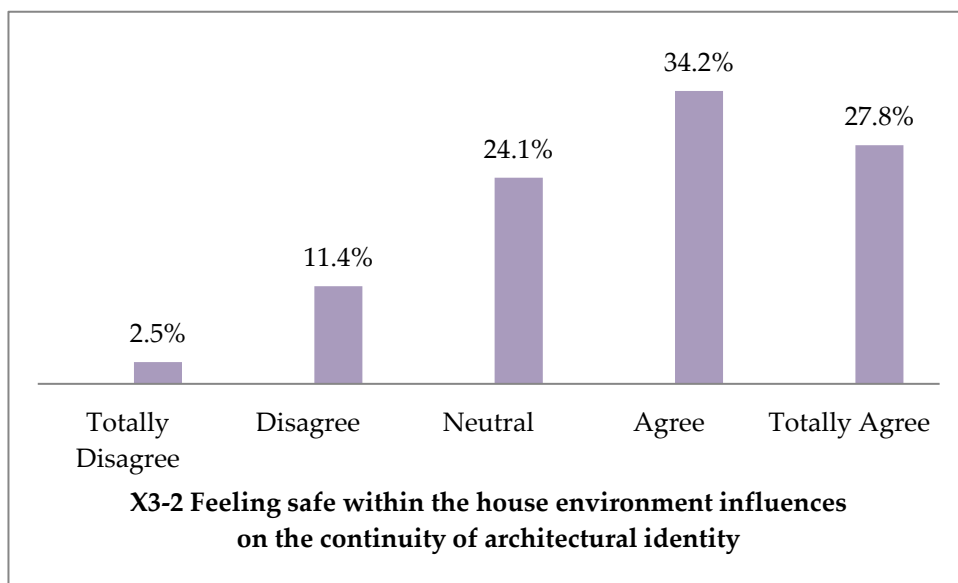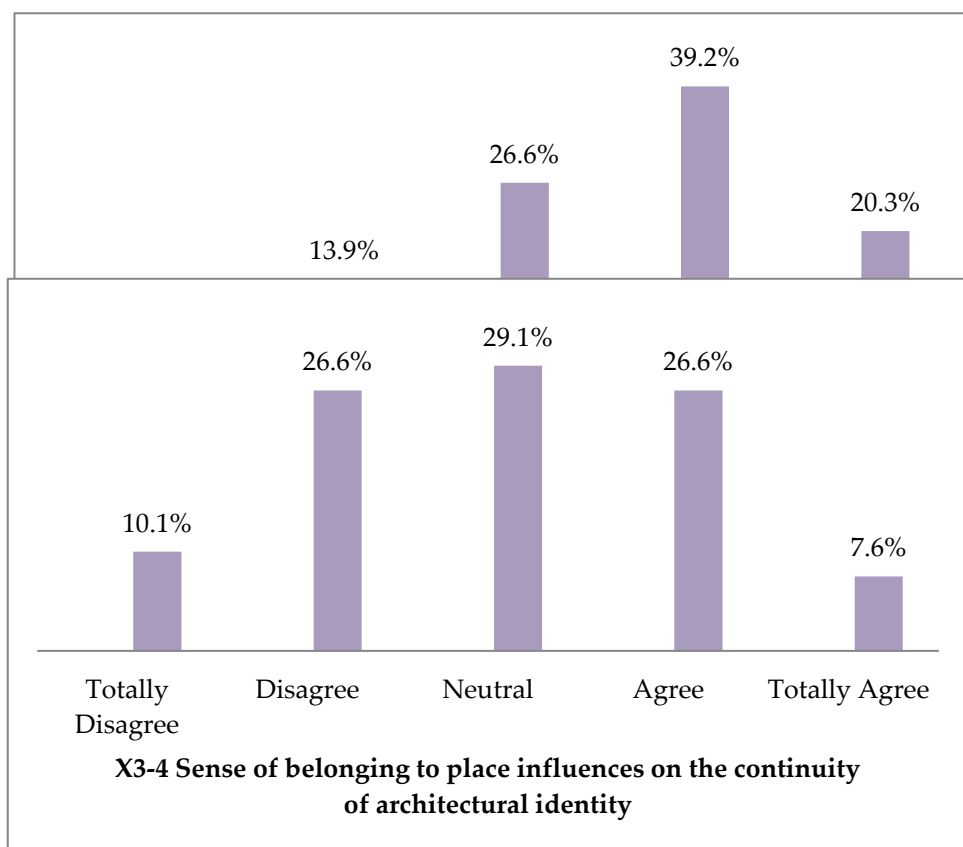

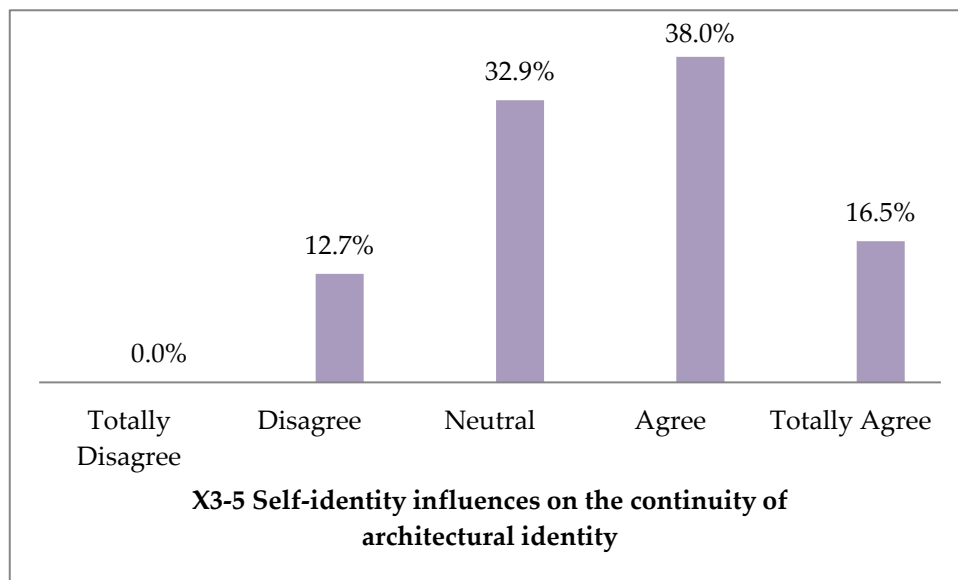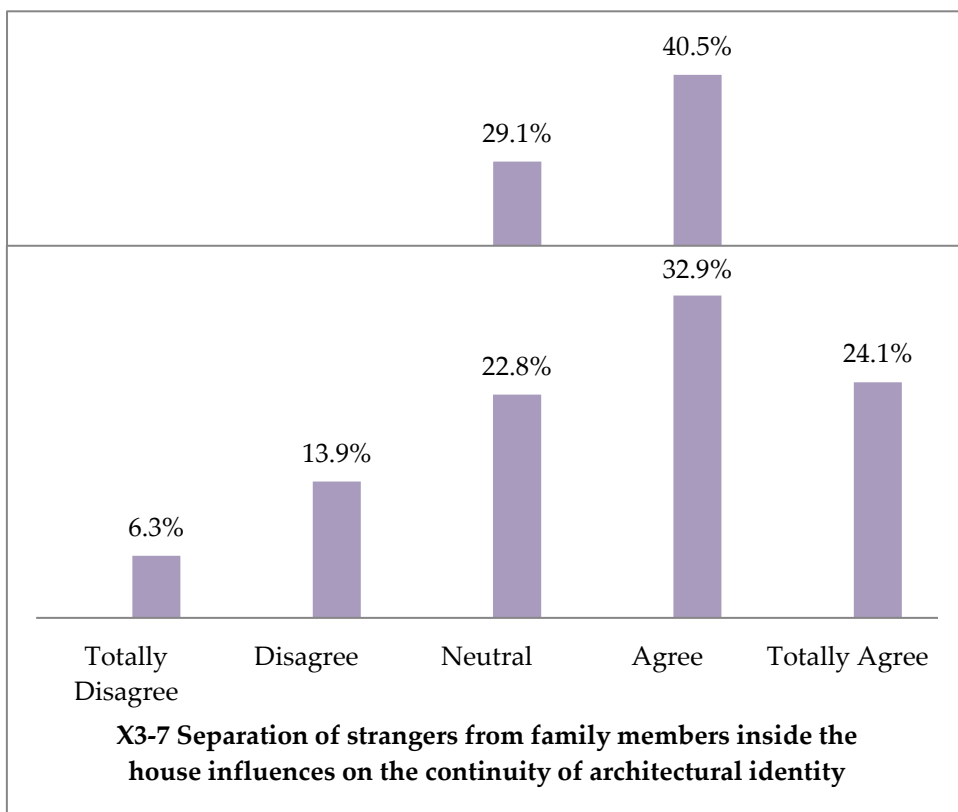

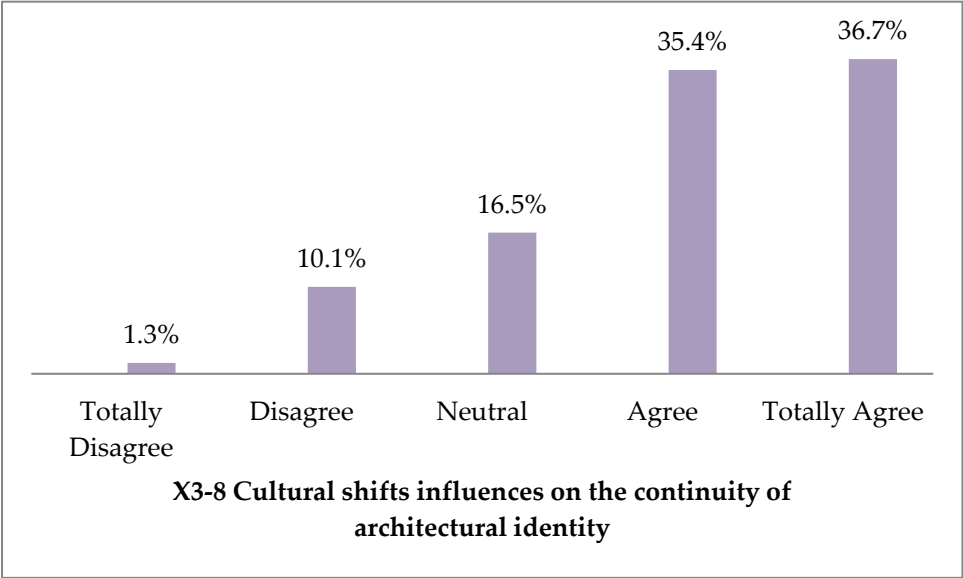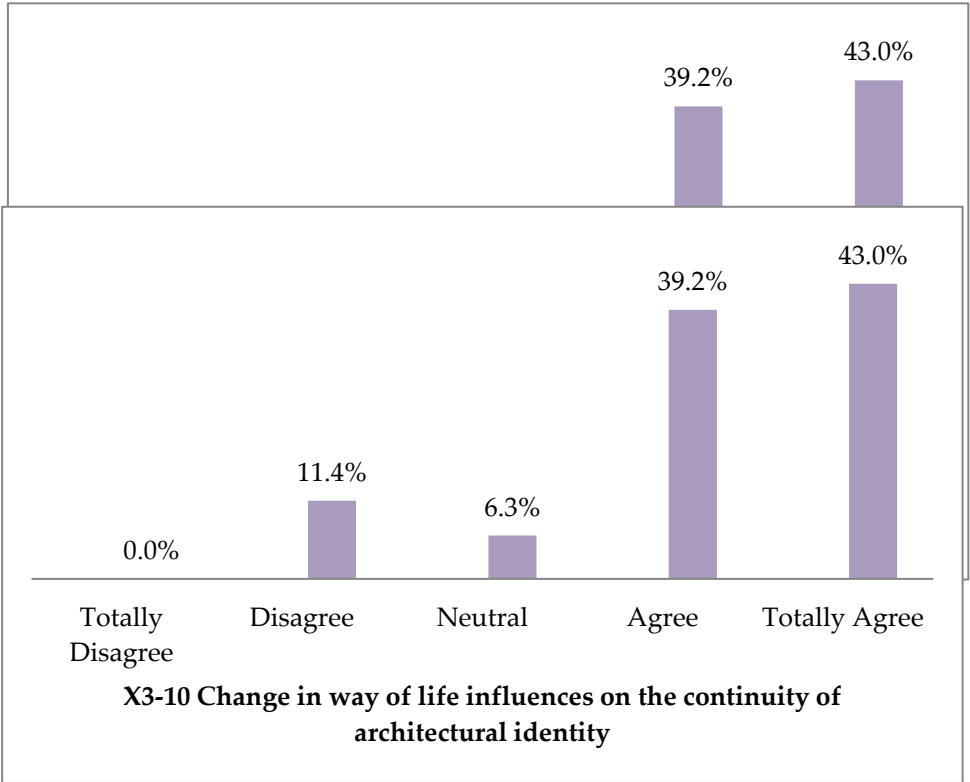

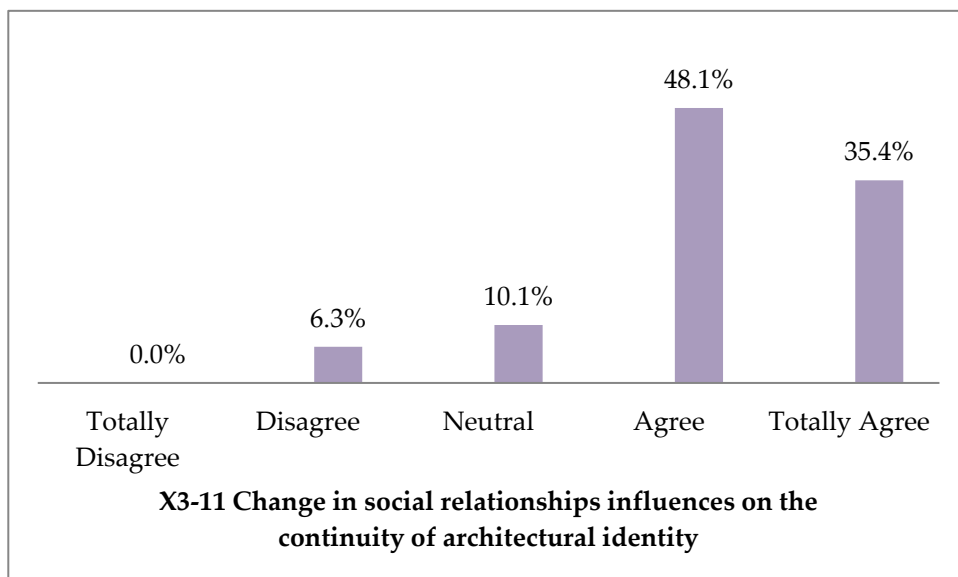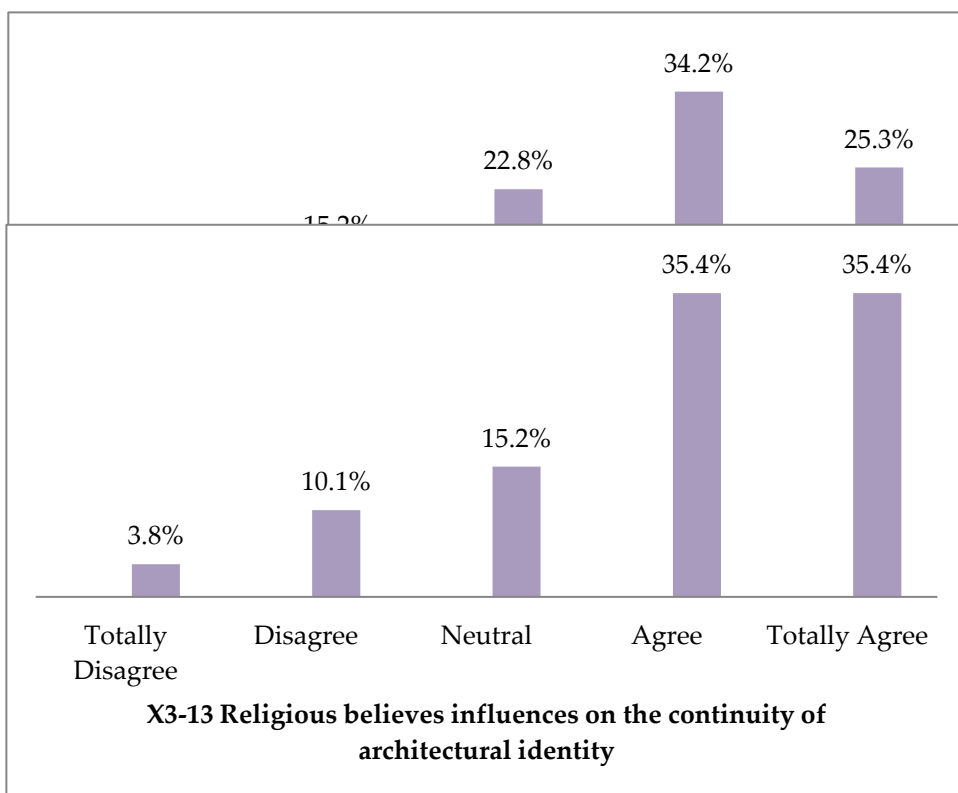

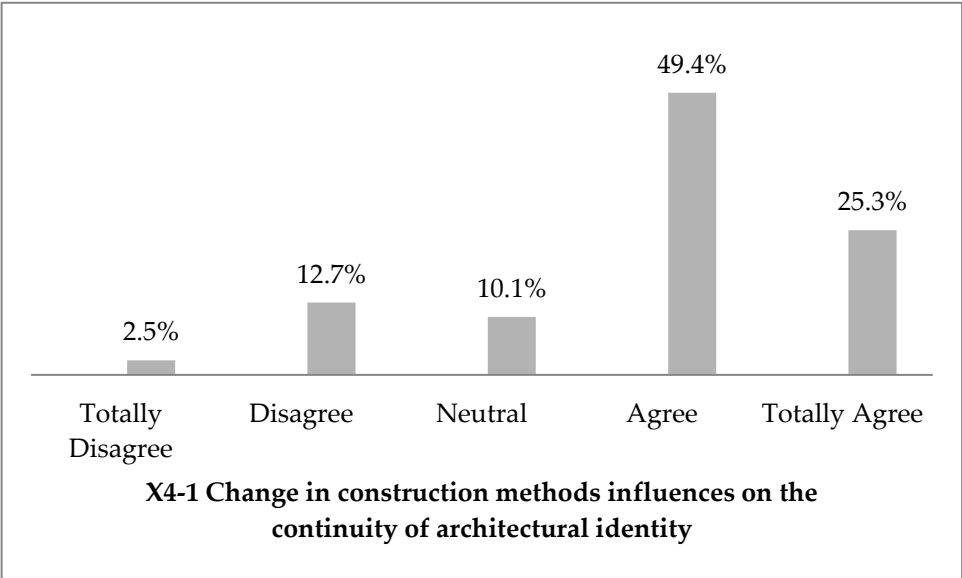

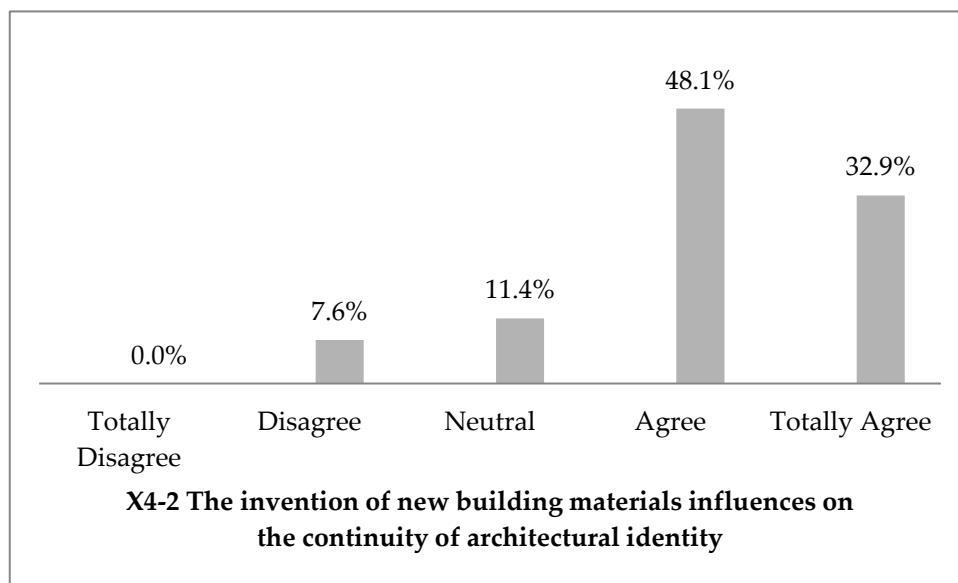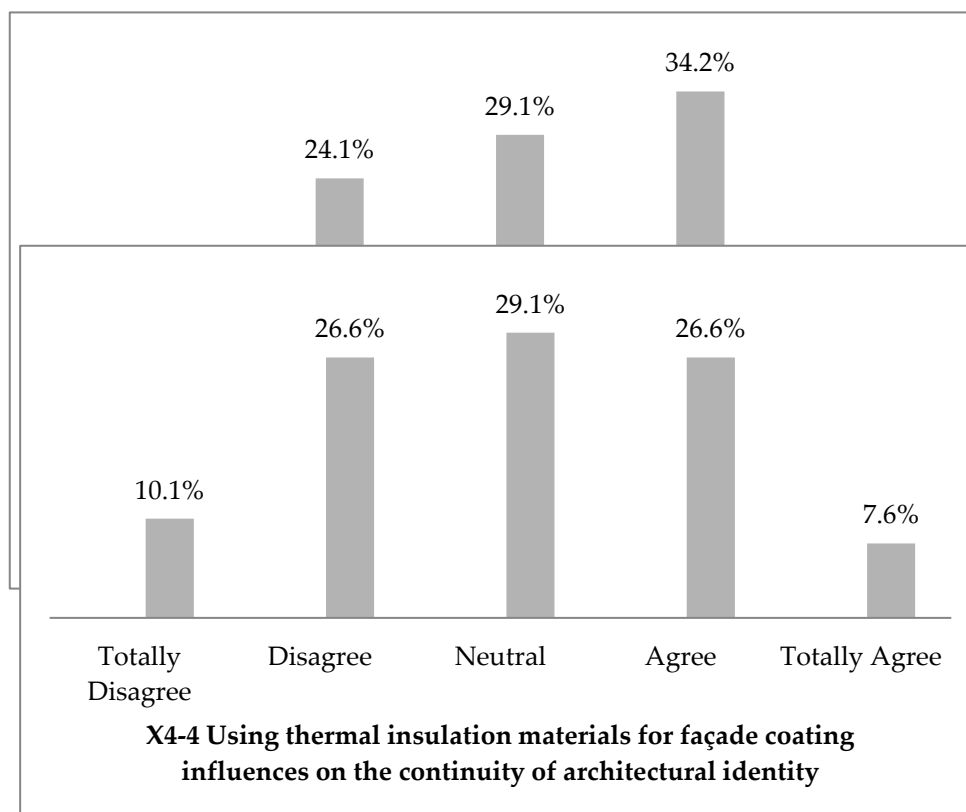

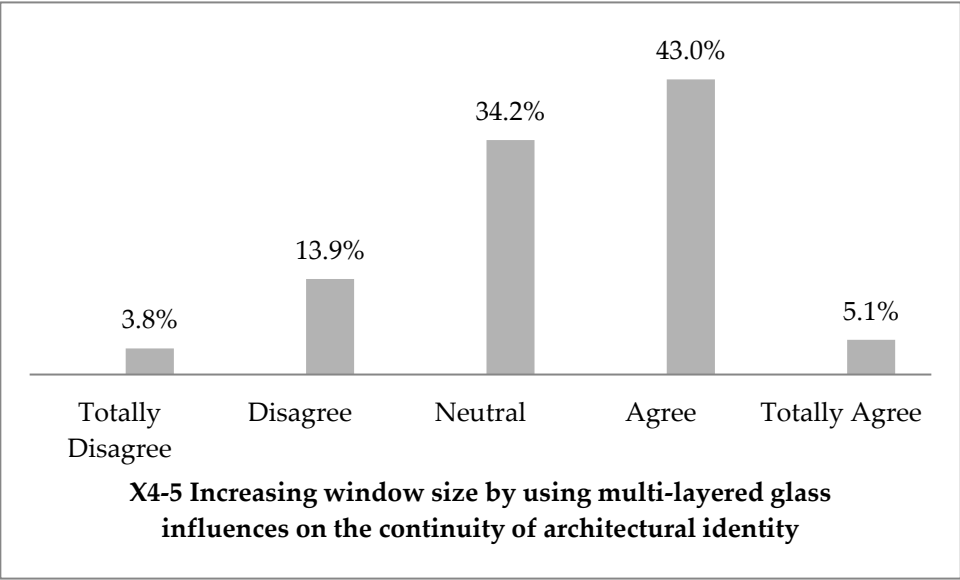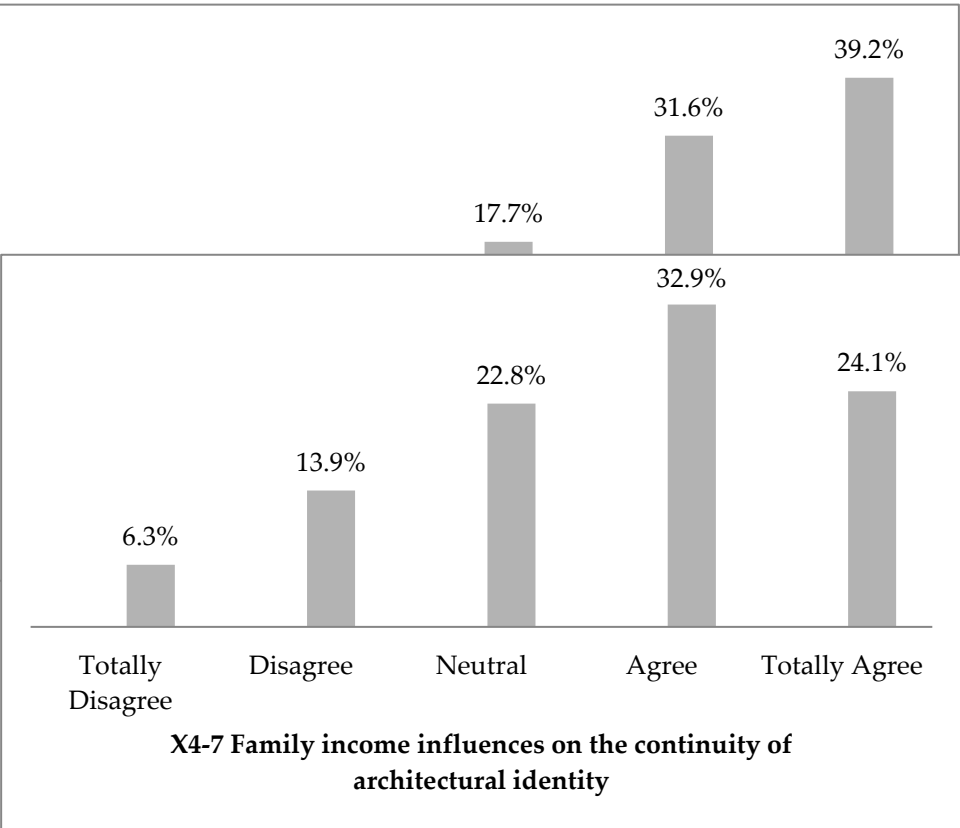

Supplement: s1 [file s1]
